# Supplementary material for: Target Inhibition Networks: Predicting Selective Combinations of Druggable Targets to Block Cancer Survival Pathways
Source: PLoS Comput Biol. 2013 Sep 12;9(9):e1003226. doi: 10.1371/journal.pcbi.1003226 (PMC3772058; doi:10.1371/journal.pcbi.1003226)
Supplement: Dataset S1 — Binding affinity data for the CanOS1224 cell line case study. (XLSX) [file pcbi.1003226.s001.xlsx]

## Sheet: Scaled.Binding.Affinity.CanOS
Index	Accession Number	Entrez Gene Symbol	Kinase Target	ABT-869	AMG-706	AST-487	AZD-1152HQPA	BIRB-796	BMS-387032/SNS- 032	CHIR-258/TKI-258	CHIR-265/RAF- 265	CI-1033	CP-690550	Dasatinib	EKB-569	Erlotinib	Flavopiridol	Gefitinib	GW-2580	GW-786034	Imatinib	JNJ-7706621	Lapatinib	LY-333531	MLN-518	MLN-8054	PI-103	PKC-412	PTK-787	SB-202190	SB-203580	SB-431542	Sorafenib	Staurosporine	SU-14813	Sunitinib	VX-680/MK-0457	VX-745	ZD-6474
1	NP_055726.2	AAK1	AAK1	0	0	0	0	0	0	0.983	0	0	0	0	0.65	0.88	0.47	0	0	0.71	0	0.98	0	0.91	0	0	0	0.9952	0	0	0	0	0	0.99988	0.9934	0.9989	0.971	0	0
2	NP_005148.2	ABL1	ABL1	0	0.61	0.99944	0	0.66	0	0.913	0.969	0.86	0	0.999947	0.944	0.969	0	0	0	0.83	0.9988	0.88	0	0	0	0.918	0	0	0	0	0	0	0.932	0.971	0.85	0.917	0.9987	0.927	0.973
3	NP_005148.2	ABL1	ABL1(E255K)	0	0	0.9965	0	0	0	0.38	0.89	0.9	0	0.99979	0.84	0.936	0	0	0	0	0.9923	0.78	0	0	0	0.64	0	0	0	0	0	0	0.61	0.9	0	0.72	0.9955	0	0.947
4	NP_005148.2	ABL1	ABL1(H396P)	0	0	0.9977	0	0	0	0.909	0.903	0.95	0	0.99988	0.957	0.977	0	0	0	0	0.9965	0.84	0	0	0	0.918	0	0	0	0	0	0	0.84	0.979	0.907	0.9	0.99909	0.77	0.9933
5	NP_005148.2	ABL1	ABL1(M351T)	0	0	0.99938	0	0.63	0	0.933	0.979	0.936	0	0.999928	0.982	0.975	0	0	0	0	0.99915	0.918	0	0	0	0.939	0	0	0	0	0	0	0.975	0.978	0.903	0.88	0.99906	0.85	0.9918
6	NP_005148.2	ABL1	ABL1(Q252H)	0	0	0.99916	0	0.31	0	0.73	0.942	0.98	0	0.99989	0.977	0.981	0	0	0	0	0.9979	0.88	0	0	0	0.936	0	0	0	0	0	0	0.952	0.9909	0.79	0.911	0.9983	0.78	0.99
7	NP_005148.2	ABL1	ABL1(T315I)	0.83	0	0.99977	0.72	0.9958	0	0.937	0.82	0.945	0	0.941	0.914	0.981	0	0	0	0.66	0	0.9932	0	0	0	0.955	0	0.68	0	0	0	0	0.984	0.9973	0.974	0.986	0.99937	0	0.9922
8	NP_005148.2	ABL1	ABL1(Y253F)	0	0	0.9995	0	0.43	0	0.8	0.965	0.927	0	0.999904	0.981	0.984	0	0	0	0	0.9956	0.88	0	0	0	0.937	0	0	0	0	0	0	0.958	0.973	0.88	0.905	0.9977	0.88	0.9906
9	NP_005149.2	ABL2	ABL2	0	0	0.99966	0	0	0	0	0.81	0.913	0	0.999983	0.963	0.98	0	0	0	0.7	0.999	0	0	0	0	0.67	0	0	0	0	0	0	0.71	0.989	0	0.9	0.9996	0.81	0.9931
10	NP_001096.1	ACVR1	ACVR1	0	0	0	0	0	0	0	0	0.83	0	0.938	0	0	0.81	0	0	0	0	0.41	0	0	0.75	0	0	0	0	0	0	0	0	0.953	0	0	0.81	0	0.985
11	NP_004293.1	ACVR1B	ACVR1B	0	0	0	0	0	0	0	0	0	0	0.967	0	0	0	0	0	0	0	0	0	0	0	0	0	0	0	0.905	0.7	0.981	0	0.932	0	0	0	0	0
12	NP_001607.1	ACVR2A	ACVR2A	0	0	0	0	0	0	0	0	0	0	0.979	0	0	0	0	0	0	0	0.71	0	0	0	0	0	0	0	0	0	0	0	0	0	0	0	0	0
13	NP_001097.2	ACVR2B	ACVR2B	0	0	0	0	0	0	0	0	0	0	0.943	0	0	0.76	0	0	0.76	0	0.41	0	0	0	0	0	0	0	0.52	0	0	0	0.54	0	0	0	0	0
14	NP_000011.2	ACVRL1	ACVRL1	0	0	0	0	0	0	0	0	0	0	0.954	0	0	0	0	0	0	0	0.71	0	0	0	0	0	0	0	0	0	0	0	0	0	0	0	0	0.953
15	NP_064632.2	CABC1	ADCK3	0	0	0	0	0	0	0	0	0.85	0	0.981	0	0.81	0	0	0	0	0	0.88	0	0	0	0	0	0	0	0	0	0	0	0	0	0	0	0	0.55
16	NP_079152.3	ADCK4	ADCK4	0	0	0	0	0	0	0	0	0.66	0	0	0.39	0.75	0	0	0	0	0	0	0	0	0	0	0	0	0	0.51	0.69	0	0	0	0	0	0	0	0.83
17	NP_005154.2	AKT1	AKT1	0	0	0	0	0	0	0	0	0	0	0	0	0	0	0	0	0	0	0	0	0	0	0	0	0.905	0	0	0	0	0	0.998	0	0	0	0	0
18	NP_001617.1	AKT2	AKT2	0	0	0	0	0	0	0	0	0	0	0	0	0	0	0	0	0	0	0	0	0	0	0	0	0.922	0	0	0	0	0	0.9956	0	0.73	0	0	0
19	NP_005456.1	AKT3	AKT3	0	0	0	0	0	0	0	0	0	0	0	0	0	0	0	0	0	0	0	0	0.86	0	0	0	0	0	0	0	0	0	0.983	0	0	0	0	0
20	NP_004295.2	ALK	ALK	0.84	0	0.86	0	0	0	0.65	0	0	0	0	0.29	0.88	0.933	0	0	0.78	0	0.29	0	0	0	0	0	0.973	0	0	0	0	0	0.9968	0.951	0.983	0.69	0	0.79
21	BAA36547.1	PRKAA1	AMPK-alpha1	0	0	0.86	0	0	0	0.948	0.55	0	0	0	0	0	0	0	0	0	0	0.83	0	0	0	0	0	0.982	0	0	0	0	0	0.99963	0.99	0.9981	0.89	0	0
22	NP_006243.2	PRKAA2	AMPK-alpha2	0	0	0	0	0	0	0.918	0	0	0	0	0	0	0	0	0	0	0	0.82	0	0	0	0	0	0.954	0	0	0	0	0	0.9988	0.971	0.9911	0.965	0	0
23	NP_848605.1	ANKK1	ANKK1	0	0	0.937	0.85	0.9	0	0.9921	0	0	0	0	0	0	0	0	0	0	0	0.95	0	0	0	0	0	0	0	0	0	0	0	0.973	0.984	0.969	0.44	0	0
24	NP_055655.1	NUAK1	ARK5	0	0	0	0	0	0	0.976	0	0	0	0	0	0	0	0	0	0	0	0.982	0	0.82	0	0	0	0.9959	0	0	0	0	0	0.99956	0.954	0.9952	0.98	0	0
25	NP_003591.2	AURKA	AURKA	0.84	0	0	0.941	0	0.26	0	0	0	0	0	0	0.78	0	0	0	0.29	0	0.975	0	0	0	0.99935	0	0.988	0	0	0	0	0	0.989	0	0.83	0.99959	0	0
26	AAH00442.2	AURKB	AURKB	0.961	0	0	0.99928	0	0	0.972	0	0.58	0	0	0	0.86	0	0	0	0	0	0.984	0	0	0	0.9957	0	0.9938	0	0	0	0	0.956	0.9981	0.966	0.962	0.99926	0	0
27	AAC77369.1	AURKC	AURKC	0.9929	0.81	0.926	0.99956	0	0	0.89	0	0.72	0	0	0	0.94	0	0	0	0.925	0	0.9914	0	0	0.84	0.9974	0	0.983	0	0	0	0	0.979	0.9977	0.919	0.978	0.99937	0	0.85
28	NP_001690.2	AXL	AXL	0.966	0	0.943	0.961	0	0	0.62	0	0.43	0	0	0.908	0	0.65	0	0	0	0	0.78	0	0	0	0.956	0	0.938	0	0	0	0	0.55	0.99932	0.9916	0.9991	0.979	0	0.975
29	NP_060063.2	BMP2K	BIKE	0	0	0	0	0	0	0.9946	0	0.62	0	0	0.78	0.88	0	0	0	0.12	0	0.982	0	0.957	0	0	0	0.978	0	0	0	0	0	0.99944	0.9973	0.99945	0.9935	0	0
30	NP_001706.2	BLK	BLK	0	0.78	0.997	0.85	0.932	0	0.981	0	0.9955	0	0.999979	0.9922	0.981	0	0.88	0	0.74	0.948	0	0	0	0	0.9932	0	0.95	0	0	0	0	0	0.9985	0.925	0.9935	0.78	0.69	0.9934
31	NP_004320.2	BMPR1A	BMPR1A	0	0	0	0	0	0	0	0	0	0	0	0	0	0	0	0	0	0	0	0	0	0	0	0	0	0	0	0	0	0	0.63	0	0	0	0	0
32	NP_001195.2	BMPR2	BMPR2	0.22	0	0	0	0	0	0.69	0	0	0	0	0	0	0	0	0	0	0	0.912	0	0	0	0	0	0	0	0	0	0	0	0	0.98	0.943	0.29	0	0
33	NP_001712.1	BMX	BMX	0	0	0	0	0	0	0	0	0.74	0	0.99986	0.26	0	0	0	0	0	0	0.53	0	0	0	0.69	0	0	0	0	0	0	0	0.983	0	0	0.74	0	0
34	NP_004324.2	BRAF	BRAF	0	0.937	0.83	0	0.73	0	0	0.88	0	0	0.95	0	0	0	0	0	0.927	0	0	0	0	0	0	0.71	0	0	0.52	0.929	0	0.946	0	0	0	0	0	0
35	NP_004324.2	BRAF	BRAF(V600E)	0	0.972	0.987	0	0	0	0	0.967	0	0	0.943	0	0	0	0	0	0.957	0.67	0	0	0	0	0	0.77	0	0	0.938	0.947	0	0.974	0	0	0	0	0	0
36	NP_115806.1	BRSK1	BRSK1	0	0	0	0	0	0	0	0	0	0	0	0	0	0	0	0	0	0	0.35	0	0	0	0	0	0.88	0	0	0	0	0	0.9974	0.5	0.65	0	0	0
37	NP_003948.2	BRSK2	BRSK2	0	0	0	0	0	0	0	0	0	0	0	0	0	0	0	0	0	0	0.73	0	0	0	0	0	0.935	0	0	0	0	0	0.99965	0.59	0.89	0	0	0
38	NP_000052.1	BTK	BTK	0	0	0	0	0	0	0	0	0.84	0	0.99986	0.51	0	0	0	0	0	0	0	0	0	0	0.58	0	0	0	0	0	0	0	0.979	0	0	0.56	0	0
39	NP_003647.1	CAMK1	CAMK1	0	0	0.7	0	0	0	0	0	0	0.5	0	0	0	0	0	0	0.79	0	0	0	0	0	0	0	0.8	0	0	0	0	0	0.9973	0.67	0.903	0	0	0
40	NP_065130.1	CAMK1D	CAMK1D	0	0	0	0	0	0	0	0	0	0	0	0.41	0	0	0	0	0	0	0	0	0	0	0	0	0.933	0	0	0	0	0	0.99989	0.903	0.949	0.51	0	0
41	NP_065172.1	CAMK1G	CAMK1G	0	0	0	0	0	0	0	0	0	0	0	0	0	0	0	0	0.63	0	0	0	0	0	0	0	0.82	0	0	0	0	0	0.9977	0.906	0.956	0	0	0
42	NP_741960.1	CAMK2A	CAMK2A	0	0	0	0	0	0	0	0	0	0	0	0	0	0.83	0	0	0	0	0	0	0.55	0	0	0	0.998	0	0	0	0	0	0.999984	0.965	0.992	0	0	0
43	NP_001211.3	CAMK2B	CAMK2B	0	0	0	0	0	0	0	0	0	0	0	0	0	0	0	0	0	0	0	0	0	0	0	0	0.979	0	0	0	0	0	0.99987	0.77	0.86	0	0	0
44	AAD20442.1	CAMK2D	CAMK2D	0	0	0	0	0	0	0	0	0	0	0	0	0	0	0	0	0	0	0	0	0.54	0	0	0	0.9964	0	0	0	0	0	0.999968	0.924	0.958	0	0	0
45	NP_751912.1	CAMK2G	CAMK2G	0	0	0	0	0	0	0	0	0	0	0	0	0	0	0	0	0	0	0	0	0.22	0	0	0	0.986	0	0	0	0	0	0.999945	0.89	0.931	0	0	0
46	NP_001735.1	CAMK4	CAMK4	0	0	0.63	0	0	0	0	0	0	0	0	0	0	0.68	0	0	0	0	0	0	0	0	0	0	0	0	0	0	0	0	0.9959	0.73	0.911	0	0	0
47	NP_115670.1	CAMKK1	CAMKK1	0	0	0.978	0	0	0	0.69	0	0	0	0	0.49	0	0.9921	0	0	0	0	0.71	0	0.5	0	0	0	0.987	0	0	0	0	0	0.999996	0.915	0.958	0	0	0
48	NP_006540.3	CAMKK2	CAMKK2	0	0	0.978	0	0	0	0	0	0	0	0	0.75	0	0.957	0	0	0	0	0.74	0	0.76	0	0	0	0.9927	0	0	0	0	0	0.999984	0.75	0.85	0	0	0
49	NP_277023.1	CDC2L1	CDC2L1	0.87	0	0.86	0.88	0	0.9902	0	0	0	0	0	0	0	0	0	0	0.79	0	0.985	0	0	0	0	0	0	0	0	0	0	0	0	0	0	0.971	0	0
50	NP_076916.1	CDC2L2	CDC2L2	0.88	0	0.89	0.9	0	0.9952	0	0	0	0	0	0	0	0	0	0	0.87	0	0.989	0	0	0	0	0	0	0	0	0	0	0	0	0	0	0.974	0	0
51	NP_055891.1	CDC2L6	CDK11	0.9926	0	0.99985	0	0.98	0.905	0	0.49	0	0	0	0	0	0.9943	0	0	0	0.45	0	0	0	0	0	0	0.28	0	0	0	0	0.975	0.981	0	0	0	0	0
52	NP_001789.2	CDK2	CDK2	0	0	0.924	0	0	0.9931	0	0	0	0	0	0	0	0.945	0	0	0	0	0.9977	0	0	0	0	0	0	0	0	0	0	0	0.9993	0	0	0	0	0
53	NP_001249.1	CDK3	CDK3	0	0	0.9918	0	0	0.9944	0	0	0	0	0	0	0	0.959	0	0	0	0	0.982	0	0	0	0	0	0	0	0	0	0	0	0.997	0	0	0	0	0
54	NP_004926.1	CDK5	CDK5	0	0	0.9	0	0.8	0.926	0	0	0	0	0	0	0	0.989	0	0	0	0	0.976	0	0	0	0	0	0	0	0	0	0	0	0.9916	0	0	0	0	0
55	NP_001790.1	CDK7	CDK7	0.71	0	0.99955	0.38	0	0.9969	0.74	0	0	0	0	0	0	0.9977	0	0	0	0	0.924	0	0	0	0	0	0	0	0	0	0	0.986	0.9955	0.907	0.967	0	0	0
56	NP_001251.1	CDK8	CDK8	0.9905	0	0.99986	0	0.978	0.88	0	0	0	0	0	0	0	0.988	0	0	0	0	0	0	0	0	0	0	0	0	0	0	0	0.969	0.949	0	0	0	0	0
57	NP_001252.1	CDK9	CDK9	0.7	0	0.981	0	0	0.9924	0	0	0	0	0	0	0	0.99936	0	0	0	0	0.953	0	0	0	0	0	0	0	0	0	0	0	0.99	0	0	0	0	0
58	NP_001265.1	CHEK1	CHEK1	0	0	0	0	0	0	0.88	0	0	0	0	0.81	0	0	0	0	0	0	0	0	0.946	0	0	0	0.87	0	0	0	0	0	0.99968	0.88	0.97	0	0	0
59	NP_009105.1	CIT	CIT	0	0.97	0.9948	0.43	0.79	0	0.18	0.9913	0.87	0	0	0.969	0.932	0.989	0.87	0	0	0	0	0	0.86	0	0	0	0	0.12	0.949	0.958	0	0.38	0.966	0.9906	0.61	0	0	0.82
60	AAA61480.1	CLK1	CLK1	0.11	0	0.989	0	0	0.959	0.32	0	0	0	0	0.67	0	0.83	0	0	0	0.55	0.934	0	0.909	0.937	0	0.61	0.965	0	0	0	0	0	0.9968	0.964	0.9978	0	0	0
61	NP_003984.2	CLK2	CLK2	0	0	0.82	0	0	0.89	0.83	0	0	0	0	0.82	0	0.78	0	0	0	0	0.971	0	0.958	0	0.68	0	0.914	0	0	0	0	0	0.99918	0.985	0.998	0	0	0
62	NP_003983.1	CLK3	CLK3	0	0	0	0	0	0	0	0	0	0	0	0.44	0	0.84	0	0	0	0	0.969	0	0	0	0.77	0	0	0	0	0	0	0	0.909	0	0	0	0	0
63	NP_065717.1	CLK4	CLK4	0.84	0	0.971	0	0	0.92	0.35	0	0	0	0	0.61	0	0	0	0	0	0.79	0.83	0	0.81	0.84	0	0	0.959	0	0	0	0	0	0.99904	0.975	0.9971	0	0	0
64	NP_005202.2	CSF1R	CSF1R	0.99966	0.99944	0.99942	0.86	0.19	0	0.994	0.975	0	0	0.999942	0.57	0	0.72	0	0.99984	0.99921	0.9981	0.58	0	0	0.99951	0	0	0.967	0.9982	0	0	0	0.9972	0.9988	0.99964	0.9998	0.82	0.74	0.88
65	NP_004374.1	CSK	CSK	0	0	0.77	0	0	0	0	0	0.39	0	0.9999	0.66	0	0	0	0	0	0	0	0	0	0	0.1	0	0.13	0	0	0	0	0	0.967	0	0	0.52	0	0.75
66	NP_660204.1	CSNK1A1L	CSNK1A1L	0	0	0	0	0	0	0	0	0	0	0	0.9	0	0	0	0	0	0	0	0	0	0	0	0	0	0	0.81	0.83	0.41	0	0.975	0.85	0.945	0	0	0
67	NP_620693.1	CSNK1D	CSNK1D	0	0	0.75	0	0	0.82	0	0	0	0	0	0.89	0.65	0	0	0	0	0	0	0	0	0	0	0	0	0	0.9941	0.9963	0.983	0	0.76	0.974	0.9985	0	0	0
68	NP_001885.1	CSNK1E	CSNK1E	0	0	0.6	0	0	0.905	0	0	0	0	0.85	0.99	0	0	0.957	0	0	0	0.64	0	0	0	0	0	0	0	0.983	0.99	0.974	0	0.9927	0.966	0.9987	0	0	0.7
69	NP_071331.2	CSNK1G1	CSNK1G1	0	0	0	0	0	0	0	0	0	0	0	0	0	0	0	0	0	0	0.88	0	0	0	0	0	0	0	0	0	0	0	0	0.9	0.907	0	0	0
70	NP_001310.2	CSNK1G2	CSNK1G2	0	0	0.905	0	0	0	0	0	0	0	0	0	0	0	0	0	0	0	0.926	0	0	0	0	0	0	0	0	0	0	0	0.922	0.921	0.989	0	0	0
71	NP_004375.2	CSNK1G3	CSNK1G3	0	0	0.9903	0	0	0	0	0	0	0	0	0	0	0	0	0	0	0	0.21	0	0	0	0	0	0	0	0	0	0	0	0	0.943	0.976	0	0	0
72	NP_001886.1	CSNK2A1	CSNK2A1	0	0	0	0	0	0	0.86	0	0	0	0	0	0	0	0	0	0	0	0	0	0.64	0	0	0	0.975	0	0	0	0	0	0.9964	0.9903	0.9919	0.96	0	0
73	NP_001887.1	CSNK2A2	CSNK2A2	0	0	0	0	0	0	0.84	0	0	0	0	0	0	0	0	0	0	0	0.8	0	0.66	0	0	0	0	0	0	0	0	0	0.99935	0.986	0.963	0.96	0	0
74	NP_004929.2	DAPK1	DAPK1	0	0	0	0	0	0	0	0	0	0	0	0	0	0	0	0	0	0	0	0	0.903	0	0	0.76	0.53	0	0	0	0	0	0.99986	0.973	0.988	0	0	0
75	NP_055141.2	DAPK2	DAPK2	0	0	0	0	0	0	0	0	0	0	0	0	0	0	0	0	0	0	0	0	0	0	0	0.73	0.911	0	0	0	0	0	0.99984	0.96	0.985	0	0	0
76	NP_001339.1	DAPK3	DAPK3	0	0	0.68	0	0	0	0	0	0	0	0	0	0	0	0.43	0	0	0	0	0	0	0	0	0.916	0.82	0	0	0	0	0	0.9999	0.983	0.9978	0	0	0
77	NP_004725.1	DCAMKL1	DCAMKL1	0	0	0	0	0	0.84	0	0	0	0	0	0	0	0.79	0	0	0	0	0.75	0	0	0	0	0	0	0	0	0	0	0	0.989	0.945	0.963	0	0	0
78	NP_001035351.1	DCAMKL2	DCAMKL2	0	0	0	0	0	0.9	0	0	0	0	0	0	0	0	0	0	0	0	0.55	0	0	0	0	0	0	0	0	0	0	0	0.9927	0	0.73	0	0	0
79	XP_047355.6	DCAMKL3	DCAMKL3	0	0	0	0	0	0.84	0.87	0	0	0.99955	0	0.51	0	0.89	0	0	0	0	0.35	0	0	0	0	0	0	0	0	0	0	0	0.9983	0.976	0.989	0.64	0	0
80	NP_001945.3	DDR1	DDR1	0.9942	0.974	0.999931	0.82	0.99981	0	0.75	0.9987	0.96	0	0.999931	0	0.921	0	0	0	0.9943	0.99993	0	0	0	0.86	0.58	0	0.28	0.973	0.89	0.9	0	0.99985	0.9981	0	0.8	0.9972	0.89	0.9989
81	CAA52777.1	DDR2	DDR2	0.62	0	0.9989	0	0.9967	0	0	0.904	0	0	0.99968	0	0	0	0	0	0.9902	0.9985	0	0	0	0	0	0	0	0	0.84	0.5	0	0.99934	0.9958	0	0	0.977	0	0.968
82	NP_006292.2	MAP3K12	DLK	0	0	0.75	0	0	0	0.79	0	0	0	0	0.74	0	0	0	0	0	0	0.48	0	0	0	0	0	0	0	0	0	0	0	0.85	0.944	0.99	0.981	0	0
83	NP_004400.4	DMPK	DMPK	0	0	0	0	0	0	0	0	0	0	0.87	0.9941	0.71	0.935	0.31	0	0	0	0.88	0	0.972	0	0	0	0.62	0	0	0	0	0	0.99965	0	0	0	0	0
84	NP_059995.1	CDC42BPG	DMPK2	0	0	0	0	0.88	0	0	0	0	0	0.88	0	0.66	0	0	0	0	0	0	0	0	0	0	0	0	0	0.936	0.96	0	0	0.9963	0	0	0	0	0.78
85	NP_004751.2	STK17A	DRAK1	0	0	0	0	0	0.956	0.917	0	0	0	0	0.98	0	0	0.8	0	0	0.47	0.44	0	0	0	0.981	0	0.81	0	0	0	0	0	0.9986	0.9976	0.9999	0	0	0
86	NP_004217.1	STK17B	DRAK2	0	0	0	0	0	0	0.82	0	0	0	0	0.58	0	0.81	0.62	0	0	0	0	0	0	0	0.99919	0	0.53	0	0	0	0	0	0.9979	0.968	0.989	0	0	0
87	NP_004705.1	DYRK1B	DYRK1B	0	0	0	0	0	0.98	0	0	0	0	0	0.6	0	0.9916	0	0	0	0	0	0	0.46	0	0	0	0.967	0	0	0	0	0	0.9972	0.74	0.77	0	0	0
88	NP_005219.2	EGFR	EGFR	0	0.9985	0.948	0.955	0.3	0	0	0	0.999981	0	0.988	0.999956	0.999933	0	0.9999	0	0	0	0	0.99976	0	0.959	0	0	0.87	0	0.74	0.83	0	0	0.963	0	0	0	0	0.99905
89	NP_005219.2	EGFR	EGFR(E746-A750del)	0	0	0.81	0	0	0	0	0	0.999974	0	0.987	0.999962	0.999952	0	0.999946	0	0	0	0	0.99914	0	0.967	0	0	0.3	0	0.979	0.966	0	0	0.988	0	0	0	0	0.99952
90	NP_005219.2	EGFR	EGFR(G719C)	0.35	0.77	0.978	0.988	0.4	0	0	0	0.999987	0	0.983	0.999976	0.999915	0	0.9998	0	0	0	0	0.999908	0	0.979	0	0	0.85	0	0.909	0.929	0	0	0.89	0.1	0.32	0	0	0.99904
91	NP_005219.2	EGFR	EGFR(G719S)	0	0.88	0.948	0.983	0.09	0	0	0	0.999981	0	0.9921	0.999958	0.999948	0	0.99989	0	0	0	0	0.99979	0	0.977	0	0	0.47	0	0.81	0.87	0	0	0.89	0	0	0	0	0.99941
92	NP_005219.2	EGFR	EGFR(L747-E749del, A750P)	0	0.88	0.978	0.71	0.47	0	0	0	0.999983	0	0.989	0.999976	0.999948	0.77	0.999943	0	0	0.24	0	0.99978	0	0.974	0	0	0.938	0	0.8	0.83	0	0	0.9904	0	0	0	0	0.9988
93	NP_005219.2	EGFR	EGFR(L747-S752del, P753S)	0	0.55	0.945	0.12	0	0	0	0	0.999974	0	0.968	0.999973	0.999953	0	0.999943	0	0	0	0	0.99961	0	0.959	0.36	0	0.83	0	0.86	0.84	0	0	0.97	0	0	0	0	0.99921
94	NP_005219.2	EGFR	EGFR(L747-T751del,Sins)	0	0.74	0.947	0.65	0.32	0	0	0	0.999974	0	0.984	0.999977	0.999965	0	0.999948	0	0	0	0	0.99965	0	0.953	0	0	0.81	0	0.89	0.85	0	0	0.979	0	0	0	0	0.99911
95	NP_005219.2	EGFR	EGFR(L858R)	0	0	0.74	0.902	0	0	0	0	0.999976	0	0.988	0.999959	0.999903	0	0.999906	0	0	0	0	0.99972	0	0.96	0.68	0	0.924	0	0.81	0.81	0	0	0.973	0	0	0	0	0.99913
96	NP_005219.2	EGFR	EGFR(L861Q)	0	0.61	0.903	0.949	0	0	0	0	0.999978	0	0.989	0.999956	0.99988	0	0.99986	0	0	0	0	0.99988	0	0.913	0	0	0.72	0	0.77	0.68	0	0	0.94	0	0	0	0	0.9989
97	NP_005219.2	EGFR	EGFR(S752-I759del)	0	0	0	0.48	0	0	0	0	0.999981	0	0.967	0.999967	0.99984	0.86	0.999902	0	0	0	0	0.99958	0	0.965	0	0	0.82	0	0.83	0.8	0	0	0.971	0	0	0	0	0.9988
98	NP_005223.3	EPHA1	EPHA1	0	0	0	0	0.02	0	0	0	0.75	0	0.99959	0	0	0	0.6	0	0	0	0	0	0	0	0.82	0	0	0	0	0	0	0.69	0.97	0	0	0.9	0	0.977
99	NP_004422.2	EPHA2	EPHA2	0	0	0.984	0	0.38	0	0	0.71	0	0	0.999915	0	0	0.75	0	0	0	0	0	0	0	0	0.963	0	0	0	0	0	0	0.8	0.88	0	0	0.916	0	0.89
100	NP_005224.2	EPHA3	EPHA3	0.65	0	0.992	0	0.912	0	0	0	0.79	0	0.999991	0.6	0.76	0.67	0	0	0	0	0	0	0	0	0.79	0	0	0	0	0	0	0.81	0.9973	0	0.79	0.85	0	0.8
101	NP_004429.1	EPHA4	EPHA4	0	0	0.96	0	0.71	0	0	0	0.64	0	0.99988	0	0	0	0	0	0	0	0	0	0	0	0.958	0	0	0	0	0	0	0.7	0.971	0	0	0.57	0	0.84
102	NP_004430.3	EPHA5	EPHA5	0	0	0.986	0	0.86	0	0	0	0.88	0	0.999976	0	0	0	0	0	0	0	0	0	0	0	0.86	0	0	0	0	0	0	0	0.9905	0	0	0	0	0.976
103	NP_001073917.1	EPHA6	EPHA6	0.967	0.951	0.962	0	0.8	0	0	0.85	0.973	0	0	0	0.956	0	0.941	0	0	0	0	0	0	0	0.942	0	0	0	0.78	0.88	0	0.963	0.971	0.8	0.904	0	0	0.995
104	NP_004431.1	EPHA7	EPHA7	0.989	0	0.89	0	0.914	0	0	0	0	0	0	0	0.86	0	0	0	0	0	0.69	0	0	0	0.9	0	0	0	0	0	0	0.47	0.937	0	0.76	0	0	0.76
105	NP_065387.1	EPHA8	EPHA8	0	0	0.9982	0	0.973	0	0	0.89	0.8	0	0.999976	0.67	0.906	0	0.82	0	0	0.86	0	0	0	0	0	0	0	0	0	0	0	0.76	0.981	0	0	0.95	0	0.9909
106	NP_004432.1	EPHB1	EPHB1	0	0	0.982	0	0.51	0	0	0	0	0	0.999955	0	0	0	0	0	0	0	0	0	0	0	0.967	0	0	0	0	0	0	0.7	0.976	0	0.952	0.81	0	0.971
107	NP_059145.2	EPHB2	EPHB2	0	0	0.987	0	0.956	0	0	0	0.73	0	0.999961	0	0	0	0	0	0	0	0	0	0	0	0	0	0	0	0	0	0	0.81	0.79	0	0	0	0	0.956
108	NP_004434.2	EPHB3	EPHB3	0.86	0	0	0	0	0	0	0	0	0	0.99931	0	0	0	0	0	0	0	0	0	0	0	0.65	0	0	0	0	0	0	0	0	0	0	0	0	0
109	NP_004435.3	EPHB4	EPHB4	0.86	0	0	0	0	0	0	0	0.82	0	0.999966	0.72	0	0	0	0	0	0	0	0	0	0	0.944	0	0	0	0	0	0	0.82	0	0	0	0.83	0	0.948
110	NP_001005862.1	ERBB2	ERBB2	0	0	0	0.57	0	0	0	0	0.9913	0	0.86	0.95	0	0	0.65	0	0	0	0	0.9993	0	0	0	0	0	0	0	0	0	0	0	0	0	0	0	0.74
111	NP_001036064.1	ERBB4	ERBB4	0	0	0	0.953	0	0	0	0	0.9971	0	0.9945	0.9979	0.977	0	0.959	0	0	0	0	0.9946	0	0	0	0	0.69	0	0.51	0	0	0	0.923	0	0	0	0	0.952
112	NP_002737.2	MAPK3	ERK1	0	0	0	0	0	0	0	0	0	0	0	0	0	0	0	0	0	0	0	0	0	0	0	0	0	0	0	0	0	0	0.16	0	0	0	0	0
113	NP_620407.1	MAPK1	ERK2	0	0	0	0	0	0	0	0	0	0	0	0	0	0	0	0	0	0	0	0	0	0	0	0	0	0	0	0	0	0	0.27	0	0	0	0	0
114	NP_002739.1	MAPK6	ERK3	0	0	0	0	0	0.95	0	0	0.83	0	0	0	0	0	0.84	0	0	0	0.952	0	0	0	0	0	0	0	0	0	0	0	0	0	0	0	0	0.85
115	NP_002738.2	MAPK4	ERK4	0	0	0	0	0	0.59	0	0	0	0	0	0	0.75	0	0.69	0	0	0	0.84	0	0	0	0	0	0	0	0	0	0	0	0	0	0	0	0	0
116	NP_002740.2	MAPk7	ERK5	0	0	0	0	0	0.935	0	0	0	0	0	0	0	0.938	0	0	0	0	0.948	0	0	0	0	0	0	0	0	0	0	0	0.84	0	0	0	0	0
117	NP_620590.2	MAPK15	ERK8	0.72	0	0.9906	0	0.7	0.988	0	0	0	0	0	0	0	0.967	0	0	0	0	0.89	0	0.9912	0	0	0	0	0	0	0	0	0.9954	0.9965	0	0	0	0	0
118	NP_005237.2	FER	FER	0	0	0.941	0	0	0	0	0	0	0	0	0.12	0	0	0	0	0.73	0	0	0	0	0	0.56	0	0.88	0	0	0	0	0	0.9976	0.9966	0.89	0	0	0
119	NP_001996.1	FES	FES	0	0	0.964	0	0	0	0	0	0	0	0	0.43	0	0	0	0	0	0	0	0	0	0	0	0	0	0	0	0	0	0	0.9977	0	0.904	0	0	0
120	NP_075593.1	FGFR1	FGFR1	0	0.38	0.938	0	0.57	0	0.985	0.53	0	0	0.63	0	0	0	0	0	0.901	0	0.919	0	0	0	0.76	0	0.84	0	0	0	0	0.72	0.991	0.81	0.948	0.945	0	0.944
121	NP_075259.2	FGFR2	FGFR2	0	0	0.81	0	0	0	0.959	0	0	0	0.86	0	0	0	0	0	0.979	0	0.932	0	0	0	0.83	0	0.76	0	0	0	0	0.73	0.99	0.921	0.943	0.943	0	0.89
122	NP_000133.1	FGFR3	FGFR3	0	0	0	0	0	0	0.977	0	0	0	0	0	0	0	0	0	0.926	0	0.949	0	0	0	0.88	0	0.83	0	0	0	0	0	0.9912	0.944	0.971	0.914	0	0.84
123	NP_000133.1	FGFR3	FGFR3(G697C)	0	0	0	0	0	0	0.963	0	0	0	0	0	0	0	0	0	0.938	0	0.931	0	0	0	0.87	0	0	0	0	0	0	0.41	0.969	0.962	0.86	0.918	0	0.31
124	NP_075252.2	FGFR4	FGFR4	0	0.32	0.86	0	0	0	0.57	0	0	0	0	0	0	0	0	0	0.72	0	0	0	0	0	0	0	0	0	0	0	0	0	0.975	0	0	0.28	0	0
125	NP_005239.1	FGR	FGR	0	0.31	0.981	0	0	0	0.981	0	0.72	0	0.99995	0.905	0.89	0	0	0	0.84	0.76	0.8	0	0	0	0.978	0	0.927	0	0	0	0	0	0.9983	0.961	0.973	0.921	0.87	0.973
126	NP_002010.1	FLT1	FLT1	0.99925	0.9988	0.9914	0.989	0.959	0	0.9931	0.92	0	0	0.5	0	0.56	0	0	0	0.9986	0	0.79	0	0	0.69	0.9	0	0.955	0.99904	0	0	0	0.9969	0.985	0.99953	0.99982	0.99	0	0.974
127	NP_004110.2	FLT3	FLT3	0.999937	0.9929	0.999921	0.99918	0.77	0	0.999936	0.86	0.73	0	0	0	0	0	0	0	0.89	0	0.915	0	0.81	0.9997	0	0	0.9989	0	0	0	0	0.9987	0.99971	0.999946	0.999953	0.99935	0	0.915
128	NP_004110.2	FLT3	FLT3(D835H)	0.99973	0.55	0.99951	0.979	0	0.26	0.99939	0	0.88	0	0.19	0.67	0.965	0.5	0.89	0	0.89	0	0.916	0	0.979	0.969	0	0	0.99932	0	0	0	0	0.997	0.99979	0.99937	0.99957	0.9986	0	0.944
129	NP_004110.2	FLT3	FLT3(D835Y)	0.9989	0	0.9989	0.933	0	0.7	0.99948	0	0.927	0	0	0.72	0.987	0.68	0.9	0	0.919	0	0.941	0	0.987	0.82	0	0	0.9985	0	0	0	0	0.9918	0.99975	0.99939	0.99977	0.9945	0	0.917
130	NP_004110.2	FLT3	FLT3(ITD)	0.99912	0.9	0.9989	0.986	0	0	0.99964	0	0.7	0	0	0	0.918	0.54	0	0	0.75	0	0.86	0	0.972	0.99909	0	0	0.9989	0	0	0	0	0.9921	0.99976	0.99982	0.999901	0.9955	0	0.82
131	NP_004110.2	FLT3	FLT3(N841I)	0.99974	0.89	0.99977	0.9957	0.5	0	0.99952	0	0.76	0	0	0.8	0.95	0.35	0.7	0	0.84	0	0.86	0	0.902	0.9971	0	0	0.9994	0	0	0	0	0.9989	0.99979	0.99946	0.99976	0.99957	0	0.88
132	CAA49505.1	FLT4	FLT4	0.9984	0.99903	0.988	0	0.29	0	0.942	0.8	0	0	0	0	0.79	0	0	0	0.9973	0	0.89	0	0	0	0.69	0	0.933	0.967	0	0	0	0.9905	0.9972	0.995	0.995	0.81	0	0.89
133	NP_002022.1	FRK	FRK	0.96	0.9901	0.9974	0	0.88	0	0.77	0.941	0.66	0	0.999969	0.932	0.8	0	0.8	0	0.925	0.85	0	0	0	0	0	0	0.76	0.82	0.69	0.82	0	0.949	0.9955	0	0.947	0.62	0	0.983
134	NP_694592.1	FYN	FYN	0	0.72	0.995	0	0	0	0.956	0.79	0	0	0.999921	0.76	0	0	0	0	0.73	0.69	0	0	0	0	0.87	0	0.79	0	0	0	0	0	0.9967	0.74	0.948	0.947	0.79	0.964
135	NP_005246.1	GAK	GAK	0	0	0.87	0	0	0.82	0.951	0	0.99	0	0.99974	0.99936	0.99969	0.963	0.9987	0	0.98	0.9	0.76	0	0.89	0	0	0	0.962	0	0.9947	0.9981	0	0	0.9983	0.9956	0.998	0.68	0	0.9914
136	NP_001013725.2	EIF2AK4	GCN2(Kin.Dom.2,S808G)	0	0.56	0	0	0	0	0.975	0.9945	0	0	0.84	0.971	0.56	0	0	0	0	0	0.61	0	0	0	0	0	0.9961	0	0	0	0	0	0.9984	0.953	0.982	0.81	0	0
137	NP_063937.2	GSK3A	GSK3A	0	0	0	0	0	0.9972	0	0	0	0	0	0	0	0.87	0	0	0	0	0.984	0	0	0	0	0	0.75	0	0	0	0	0	0.986	0	0	0	0	0
138	NP_002084.2	GSK3B	GSK3B	0	0	0	0	0	0.9963	0.965	0	0	0	0	0	0	0.927	0	0	0	0	0.905	0	0.74	0	0	0	0.82	0	0.73	0.83	0	0	0.9931	0	0	0	0	0
139	NP_002101.2	HCK	HCK	0	0	0.912	0.61	0	0	0.67	0.88	0.58	0	0.999965	0.77	0.82	0	0.56	0	0	0	0	0	0	0	0.85	0	0.928	0	0	0	0	0	0.998	0.78	0.912	0	0	0.964
140	NP_000866.1	IGF1R	IGF1R	0	0	0	0	0	0	0	0	0	0	0	0	0	0	0	0	0	0	0	0	0	0	0	0	0	0	0	0	0	0	0.979	0	0.74	0.926	0	0
141	NP_054721.1	IKBKE	IKK-epsilon	0	0	0	0	0	0	0.952	0	0	0	0	0	0	0.69	0	0	0	0	0.17	0	0	0	0	0	0.984	0	0	0	0	0	0.99949	0.952	0.938	0.74	0	0
142	NP_000199.2	INSR	INSR	0	0	0	0	0	0	0	0	0	0	0	0	0	0	0	0	0	0	0	0	0	0	0	0	0	0	0	0	0	0	0.989	0.88	0.95	0.937	0	0
143	NP_055030.1	INSRR	INSRR	0.61	0	0.86	0	0	0	0	0	0	0	0	0	0	0	0	0	0	0	0	0	0	0	0	0	0	0	0	0	0	0	0.9919	0.8	0.957	0.971	0	0
144	NP_009130.1	IRAK3	IRAK3	0	0	0	0	0	0.71	0	0	0.7	0	0	0	0	0	0.85	0	0.92	0	0.66	0	0	0.927	0.86	0	0.982	0	0	0	0	0	0.9987	0.81	0.906	0.44	0	0
145	NP_005537.3	ITK	ITK	0	0	0.901	0	0	0	0.947	0	0.44	0	0	0.75	0	0	0	0	0	0	0	0	0	0	0	0	0	0	0	0	0	0	0.9981	0.981	0.9987	0.965	0	0
146	NP_002218.2	JAK1	JAK1(Kin.Dom.1/JH2 - pseudokinase)	0	0	0	0	0	0	0.962	0	0	0	0	0	0	0	0	0	0	0	0.9979	0	0	0	0	0	0	0	0	0	0	0	0	0.9903	0.9951	0	0	0
147	NP_004963.1	JAK2	JAK2(Kin.Dom.2/JH1 - catalytic)	0	0	0.909	0	0	0	0.3	0	0	0.9995	0.9	0	0	0	0	0	0	0	0.978	0	0	0	0	0	0.9906	0	0	0	0	0	0.9989	0.84	0.959	0.981	0	0
148	NP_000206.2	JAK3	JAK3(Kin.Dom.2/JH1 - catalytic)	0	0	0.974	0	0	0	0.13	0	0.937	0.99978	0	0.9975	0.907	0	0	0	0.31	0	0.982	0	0.958	0	0	0	0.9988	0	0	0	0	0	0.999	0.942	0.88	0.937	0	0
149	NP_002741.1	MAPK8	JNK1	0	0	0.954	0	0	0	0	0	0	0	0	0	0	0	0	0	0	0.5	0.83	0	0	0	0	0	0.56	0	0.76	0.89	0	0	0.978	0	0	0	0	0
150	NP_620707.1	MAPK9	JNK2	0.976	0	0.9944	0	0.99927	0	0	0	0	0	0	0	0	0	0	0	0	0	0	0	0	0	0	0	0	0	0.979	0.987	0	0	0	0	0	0	0	0
151	NP_002744.1	MAPK10	JNK3	0	0	0.924	0	0.989	0	0	0	0.45	0	0	0	0	0.45	0.68	0	0.81	0.69	0.87	0	0	0	0	0	0.64	0	0.9958	0.9965	0	0	0.989	0	0	0.72	0	0
152	NP_000213.1	KIT	KIT	0.9998	0.99963	0.99946	0.9983	0.983	0	0.99925	0.98	0.22	0	0.999938	0	0	0	0	0	0.99972	0.9986	0.82	0	0	0.99973	0	0	0.978	0.99949	0	0	0	0.9969	0.9981	0.999932	0.999963	0.976	0	0.974
153	NP_000213.1	KIT	KIT(D816V)	0.9919	0.959	0.964	0.54	0	0	0.86	0.38	0.61	0	0.99974	0	0.84	0.54	0.57	0	0.95	0.918	0.75	0	0.908	0.9971	0	0	0.99923	0	0	0	0	0.969	0.999936	0.966	0.962	0.971	0	0.971
154	NP_000213.1	KIT	KIT(V559D)	0.99983	0.99968	0.9995	0.9985	0.977	0	0.99928	0.983	0.21	0	0.999932	0	0.69	0	0	0	0.99977	0.9985	0.86	0	0	0.99962	0	0	0.98	0.9983	0	0	0	0.9984	0.9985	0.999949	0.999959	0.976	0	0.982
155	NP_000213.1	KIT	KIT(V559D,T670I)	0.99962	0.9987	0.9982	0.99921	0.974	0	0.9974	0.976	0	0	0	0	0.87	0	0	0	0.99935	0.71	0.941	0	0	0.89	0	0	0.985	0	0	0	0	0.9982	0.99905	0.999944	0.999972	0.957	0	0.8
156	NP_000213.1	KIT	KIT(V559D,V654A)	0.9979	0.9977	0.99	0.952	0.76	0	0.99969	0.915	0	0	0.99973	0	0	0	0	0	0.997	0.9929	0	0	0	0.9974	0	0	0.84	0.979	0	0	0	0.976	0.9962	0.999975	0.999979	0.77	0	0.944
157	NP_004681.1	LATS1	LATS1	0	0	0.953	0	0	0	0.83	0	0	0	0	0	0	0	0	0	0	0	0	0	0.74	0	0	0	0.89	0	0	0	0	0	0.9958	0.915	0.937	0.45	0	0
158	NP_055387.1	LATS2	LATS2	0.83	0	0.7	0	0	0	0.947	0	0	0	0	0	0	0	0	0	0	0	0	0	0.936	0	0	0	0.78	0	0.83	0	0	0	0.9983	0.957	0.954	0	0	0
159	NP_005347.3	LCK	LCK	0	0.964	0.9989	0.962	0.88	0	0.975	0.936	0.968	0.82	0.99998	0.9901	0.975	0	0.937	0	0.88	0.996	0	0	0	0	0.941	0	0.972	0	0	0.72	0	0.73	0.997	0.77	0.977	0.9939	0.54	0.9983
160	NP_002305.1	LIMK1	LIMK1	0	0	0	0	0	0	0	0	0	0	0.943	0	0	0	0	0	0.928	0	0.938	0	0	0	0	0	0	0	0	0	0	0.84	0.952	0	0	0.74	0	0
161	NP_005560.1	LIMK2	LIMK2	0.53	0	0	0	0	0	0	0	0	0	0.9914	0	0	0	0	0	0.961	0	0.9	0	0	0	0	0.65	0	0	0	0	0	0	0.08	0	0	0.74	0	0
162	NP_000446.1	STK11	LKB1	0	0	0	0	0	0	0.63	0	0	0	0	0	0	0	0	0	0	0	0	0	0	0	0	0	0.965	0	0	0	0	0	0.9939	0.964	0.9962	0.87	0	0
163	BAA35073.1	STK10	LOK	0.954	0.89	0.999908	0.72	0.9988	0	0.945	0.994	0.81	0	0.88	0.967	0.9981	0	0.953	0	0.9916	0	0.989	0.56	0.972	0	0.63	0	0.941	0	0	0	0	0.985	0.999996	0.977	0.9981	0.988	0	0.9919
164	NP_996844.1	LTK	LTK	0.945	0	0.984	0.68	0.86	0	0	0	0	0	0	0	0.911	0.78	0	0	0	0	0	0	0	0	0	0	0.7	0	0	0	0	0	0.9963	0.58	0.82	0.25	0	0.945
165	NP_002341.1	LYN	LYN	0	0.984	0.9986	0.84	0.73	0	0.925	0.963	0.919	0	0.999943	0.928	0.947	0	0.901	0	0	0.911	0	0	0	0	0.86	0	0.58	0	0	0	0	0.7	0.996	0.919	0.973	0.935	0.83	0.989
166	NP_005913.2	MAP3K4	MAP3K4	0	0	0	0	0	0	0.45	0	0.16	0	0.969	0.972	0	0	0	0	0	0	0	0	0	0	0	0	0	0	0	0	0	0	0.88	0	0	0.75	0	0
167	NP_005914.1	MAP3K5	MAP3K5	0	0	0	0	0	0	0	0	0	0	0	0	0	0	0	0	0	0	0	0	0	0	0	0	0	0	0	0	0	0	0.989	0	0	0	0	0
168	NP_001036065.1	MAP4K1	MAP4K1	0.917	0	0.979	0	0	0	0.9956	0	0	0	0.902	0.973	0	0.67	0	0	0.925	0	0.988	0	0.74	0	0	0	0.79	0	0	0	0	0	0.99957	0.9985	0.9984	0.9928	0	0
169	NP_003609.2	MAP4K3	MAP4K3	0.68	0	0.981	0	0	0	0.944	0	0	0	0.936	0.983	0	0.55	0	0	0.84	0	0.918	0	0.16	0	0	0	0.988	0	0	0	0	0	0.99918	0.979	0.982	0.971	0	0.85
170	NP_663719.1	MAP4K4	MAP4K4	0	0	0.9985	0	0.991	0	0.984	0.87	0	0	0.69	0.967	0	0	0	0	0	0	0	0	0	0	0	0	0.935	0	0	0.63	0	0.52	0.9976	0.974	0.986	0.76	0	0.86
171	NP_006566.2	MAP4K5	MAP4K5	0.909	0	0.965	0.984	0	0	0.938	0.917	0.74	0	0.9955	0.999	0	0	0	0	0.7	0	0.79	0	0	0.922	0	0	0.89	0	0	0	0	0.84	0.9982	0.97	0.9959	0.9917	0	0.955
172	NP_116584.2	MAPKAPK2	MAPKAPK2	0	0	0	0	0	0	0	0	0	0	0	0	0	0	0	0	0	0	0	0	0	0	0	0	0	0	0	0	0	0	0.912	0	0	0	0	0
173	NP_003659.2	MAPKAPK5	MAPKAPK5	0	0	0	0	0	0	0	0	0	0	0	0	0	0	0	0	0	0	0	0	0	0	0	0	0	0	0	0	0	0	0	0	0	0	0	0
174	CAH72463.1	MARK1	MARK1	0	0	0	0	0	0	0.77	0	0	0	0	0.6	0	0	0	0	0	0	0.938	0	0	0	0	0	0.983	0	0	0	0	0	0.9996	0.85	0.88	0.51	0	0
175	NP_059672.2	MARK2	MARK2	0	0	0	0	0	0	0.85	0	0	0	0	0	0	0	0	0	0	0	0.88	0	0	0	0	0	0.99	0	0	0	0	0	0.99993	0.956	0.969	0.86	0	0
176	NP_002367.4	MARK3	MARK3	0	0	0	0	0	0	0.66	0	0	0	0	0	0	0	0	0	0.6	0	0.94	0	0	0	0	0	0.9979	0	0	0	0	0	0.9997	0.89	0.959	0.75	0	0
177	NP_113605.2	MARK4	MARK4	0	0	0	0	0	0	0.83	0	0	0	0	0	0	0	0	0	0	0	0.934	0	0	0	0	0	0.963	0	0	0	0	0	0.99946	0.8	0.64	0.51	0	0
178	NP_002746.1	MAP2K1	MEK1	0	0	0	0	0	0	0.948	0	0.82	0	0.9	0.964	0	0	0	0	0	0	0.82	0	0	0	0	0	0	0	0	0	0	0	0.9979	0.9923	0.987	0.82	0	0.82
179	NP_109587.1	MAP2K2	MEK2	0	0	0	0.43	0	0	0.965	0	0.84	0	0.86	0.919	0	0	0	0	0	0	0.44	0	0	0	0	0	0	0	0.04	0.04	0	0	0.9972	0.988	0.989	0.8	0	0.89
180	NP_002747.2	MAP2K3	MEK3	0	0	0	0	0	0	0	0	0	0	0	0	0	0	0	0	0	0	0.85	0	0	0	0	0	0.47	0	0	0	0	0	0.9995	0	0	0	0	0
181	NP_003001.1	MAP2K4	MEK4	0	0	0	0	0	0	0	0	0	0	0	0	0	0	0	0	0.941	0	0.937	0	0.907	0	0	0	0.52	0	0	0	0	0	0.993	0.86	0	0	0	0
182	NP_002749.2	MAP2K6	MEK6	0	0	0	0	0	0	0	0	0	0	0	0	0	0	0	0	0.59	0	0.9	0	0	0	0	0	0	0	0	0	0	0	0.99966	0.45	0	0.74	0	0
183	NP_055606.1	MELK	MELK	0	0	0.917	0	0	0.44	0.84	0	0	0	0	0	0	0	0	0	0	0.81	0	0	0	0	0	0	0.972	0	0	0	0	0	0.9967	0.966	0.965	0.976	0	0
184	AAB60430.1	MERTK	MERTK	0.913	0	0.963	0	0.63	0	0.82	0	0	0	0	0.87	0	0.32	0	0	0.67	0	0.72	0	0	0	0.927	0	0.71	0	0	0	0	0.64	0.99936	0.9934	0.9974	0.83	0	0.86
185	NP_000236.2	MET	MET	0.87	0	0.56	0	0	0	0	0	0.44	0	0	0.38	0.62	0	0	0	0	0	0.935	0	0	0	0	0	0.931	0	0	0	0	0	0.981	0	0	0.933	0	0.43
186	CAI14764.1	MKNK1	MKNK1	0.51	0	0.9974	0	0	0.62	0	0	0.974	0	0	0	0.931	0	0.971	0	0	0	0	0	0	0	0	0	0	0	0	0	0	0.977	0.983	0	0	0	0	0.964
187	AAF17226.1	MKNK2	MKNK2	0.973	0	0.9997	0	0.84	0	0	0	0.82	0	0	0	0	0.68	0.88	0	0	0	0	0	0	0	0	0	0.905	0	0	0	0	0.987	0.9983	0.45	0	0	0	0.83
188	NP_872299.1	MLCK	MLCK	0	0	0	0	0	0.83	0.9998	0	0	0	0	0	0	0	0	0	0	0	0	0	0	0	0	0	0	0	0	0	0	0	0.986	0.9958	0.9977	0.9985	0	0
189	NP_149132.2	MAP3K9	MLK1	0	0	0	0	0	0	0.01	0	0	0	0	0	0	0.43	0	0	0.971	0	0.64	0	0.86	0	0	0	0.9985	0	0	0	0	0	0.999	0.74	0.66	0.961	0	0
190	NP_002437.2	MAP3K10	MLK2	0	0	0	0	0	0	0	0	0	0	0	0	0	0.48	0	0	0.79	0	0	0	0	0	0	0	0.921	0	0	0	0	0	0.9948	0	0	0.82	0	0
191	NP_002410.1	MAP3K11	MLK3	0	0	0	0	0	0	0.78	0	0	0	0	0	0	0	0	0	0.926	0	0	0	0	0	0	0	0.9983	0	0	0	0	0	0.998	0.83	0.87	0.932	0	0
192	NP_003598.2	CDC42BP A	MRCKA	0	0	0	0	0.06	0	0	0	0	0	0.8	0	0	0.05	0	0	0	0	0	0	0	0	0	0.82	0	0	0	0.38	0	0	0.9943	0	0	0	0	0.74
193	NP_006026.3	CDC42BPB	MRCKB	0	0	0	0	0.909	0	0	0	0	0	0.79	0	0	0.67	0	0	0	0	0	0	0	0	0	0	0	0	0.58	0.73	0	0	0.9958	0	0	0	0	0.75
194	NP_006273.1	STK4	MST1	0.86	0	0	0	0	0	0.98	0	0	0	0	0.64	0	0	0	0	0	0	0.987	0	0	0	0	0	0.996	0	0	0	0	0	0.999981	0.987	0.9981	0.98	0	0
195	NP_006272.2	STK3	MST2	0.85	0	0.914	0	0	0	0.952	0	0	0.57	0	0.76	0	0.06	0	0	0	0	0.9939	0	0.904	0	0	0	0.978	0	0	0	0	0	0.999982	0.9935	0.9944	0.949	0	0
196	NP_003567.2	STK24	MST3	0	0	0	0	0	0	0.957	0	0	0	0	0.79	0	0	0	0	0	0	0.982	0	0	0	0	0	0	0	0	0	0	0	0.988	0.99	0.9937	0.64	0	0
197	NP_057626.2	RP6-213H19.1	MST4	0	0	0	0	0	0	0.946	0	0	0	0.81	0	0	0	0	0	0	0	0.979	0	0	0	0	0	0	0	0	0	0	0	0.986	0.967	0.966	0	0	0
198	NP_005583.1	MUSK	MUSK	0.999	0	0.99969	0.85	0.81	0	0.917	0	0	0	0	0	0	0	0	0	0	0	0	0	0	0	0	0	0	0	0	0	0	0.987	0.9914	0.99	0.951	0.97	0	0
199	NP_444254.3	MYLK	MYLK	0	0	0	0	0	0	0.65	0	0	0	0	0	0	0	0	0	0	0	0.79	0	0.971	0	0	0.85	0.8	0	0	0	0	0	0.9985	0.964	0.972	0	0	0
200	NP_149109.1	MYLK2	MYLK2	0	0	0.967	0	0	0.902	0.9908	0	0	0	0	0.61	0.903	0	0.81	0	0.8	0	0	0	0	0	0	0	0	0	0	0	0	0	0.9939	0.981	0.9951	0.9957	0	0
201	NP_059129.2	MYO3A	MYO3A	0	0	0.9959	0	0	0	0	0	0	0	0	0	0	0	0	0	0	0	0	0	0	0	0	0	0	0	0	0	0	0	0.95	0	0	0	0	0
202	NP_620482.1	MYO3B	MYO3B	0	0	0.9916	0	0	0	0	0	0	0	0	0	0	0	0	0	0	0	0	0	0	0	0	0	0	0	0	0	0	0	0.97	0	0.55	0	0	0
203	NP_055815.1	STK38L	NDR2	0	0	0	0	0	0	0	0	0	0	0	0	0	0	0	0	0	0	0	0	0	0	0	0	0	0	0	0	0	0	0.9972	0.8	0.903	0	0	0
204	NP_036356.1	NEK1	NEK1	0	0	0	0	0	0	0	0	0	0	0	0.61	0	0	0	0	0	0	0	0	0	0	0	0	0	0	0	0	0	0	0.914	0	0	0	0	0
205	NP_002488.1	NEK2	NEK2	0	0	0	0	0	0	0.8	0	0	0	0	0.932	0	0	0	0	0.902	0	0	0	0	0	0	0	0	0	0	0	0	0	0.925	0.89	0.86	0	0	0
206	NP_954983.1	NEK5	NEK5	0	0	0.89	0	0	0	0.77	0.68	0	0	0	0	0	0	0	0	0	0	0	0	0	0	0	0	0	0	0	0	0	0	0.919	0	0	0.58	0	0
207	NP_055212.2	NEK6	NEK6	0	0	0	0	0	0	0.85	0	0	0	0	0	0	0	0	0	0	0	0	0	0	0	0	0	0	0	0	0	0	0	0	0	0	0	0	0
208	NP_598001.1	NEK7	NEK7	0	0	0	0	0	0	0.44	0	0	0	0	0	0	0	0	0	0	0	0	0	0	0	0	0	0	0	0	0	0	0	0.55	0.68	0.59	0	0	0
209	NP_149107.3	NEK9	NEK9	0	0	0	0	0	0	0.09	0	0	0	0	0	0	0	0	0	0	0	0	0	0	0	0	0	0	0	0	0	0	0	0.69	0	0	0	0	0
210	NP_057315.2	NLK	NLK	0	0	0.984	0	0.9	0	0	0	0	0	0.974	0	0	0	0	0	0.56	0	0	0	0	0	0	0	0	0	0.9972	0.9975	0	0.936	0.978	0	0	0	0	0
211	NP_620581.1	MAPK14	p38-alpha	0	0	0.9927	0	0.999963	0	0	0	0	0	0.9973	0	0	0	0	0	0	0	0	0	0	0	0	0	0	0	0.99902	0.9988	0	0.963	0	0	0	0	0.99972	0
212	NP_002742.3	MAPK11	p38-beta	0	0	0.957	0	0.85	0	0	0	0	0	0.959	0	0	0	0	0	0	0	0	0	0	0	0	0	0	0	0.9968	0.993	0	0.977	0	0	0	0	0.9926	0
213	AAB40118.1	MAPK12	p38-gamma	0	0	0.9971	0	0.9981	0	0	0	0	0	0	0	0	0	0	0	0	0	0	0	0	0	0	0	0	0	0.67	0.85	0	0.24	0.9958	0	0	0	0	0
214	NP_002567.3^	PAK1	PAK1	0	0	0	0	0	0	0	0	0	0	0	0.66	0	0	0	0	0	0	0	0	0	0	0	0	0.79	0	0	0	0	0	0.999943	0	0	0.56	0	0
215	NP_002568.2	PAK2	PAK2	0	0	0	0	0	0	0	0	0	0	0	0	0	0	0	0	0	0	0	0	0	0	0	0	0.67	0	0	0	0	0	0.99969	0	0	0.43	0	0
216	NP_002569.1	PAK3	PAK3	0	0	0	0	0	0.65	0.923	0	0	0	0	0	0	0	0	0	0	0	0.79	0	0	0	0	0	0.982	0	0	0	0	0	0.99929	0.981	0.9984	0.67	0	0
217	NP_001014833.1	PAK4	PAK4	0	0	0	0	0	0	0	0	0	0	0	0	0	0	0	0	0	0	0.77	0	0	0	0	0	0	0	0	0	0	0	0.99937	0	0.77	0.57	0	0
218	NP_064553.1	PAK6	PAK6	0	0	0	0	0	0	0	0	0	0	0	0	0	0	0	0	0	0	0.86	0	0	0	0	0	0	0	0	0	0	0	0.999943	0	0.76	0	0	0
219	NP_065074.1	PAK7	PAK7/PAK5	0	0	0	0	0	0	0	0	0	0	0	0	0	0	0	0	0	0	0.917	0	0	0	0	0	0	0	0	0	0	0	0.99988	0	0.936	0.67	0	0
220	NP_006192.1^	PCTK1	PCTK1	0	0	0.958	0.37	0	0.99929	0.957	0	0	0	0	0	0	0.956	0	0	0.88	0	0.9977	0	0	0.4	0	0	0	0	0	0	0	0	0.9976	0.906	0.985	0.977	0	0
221	CAA47004.1	PCTK2	PCTK2	0	0	0.9985	0	0	0.9987	0.7	0	0	0	0	0	0	0.952	0	0	0	0	0.971	0	0	0	0	0	0	0	0	0	0	0.84	0.9904	0	0.88	0	0	0
222	NP_002587.2	PCTK3	PCTK3	0	0	0.9946	0	0	0.9956	0	0	0	0	0	0	0	0.89	0	0	0	0	0.79	0	0	0	0	0	0	0	0	0	0	0	0.973	0	0.83	0	0	0
223	NP_006197.1	PDGFRA	PDGFRA	0.99958	0.999	0.9973	0.9962	0.88	0	0.9946	0.89	0.48	0	0.999953	0	0.82	0	0	0	0.99951	0.9969	0.6	0	0	0.99976	0	0	0.962	0.9904	0	0	0	0.9938	0.999	0.99989	0.999921	0.84	0	0.977
224	NP_002600.1	PDGFRB	PDGFRB	0.99981	0.99909	0.99919	0.9959	0.89	0	0.99962	0.976	0.25	0	0.999937	0	0.86	0	0	0	0.9998	0.9986	0.909	0	0	0.99955	0	0	0.989	0.9975	0	0	0	0.9963	0.99982	0.999971	0.999992	0.969	0.16	0.9912
225	NP_002604.1	PDPK1	PDPK1	0	0	0	0	0	0	0	0	0	0	0	0	0	0	0	0	0	0	0.69	0	0.93	0	0	0	0.981	0	0	0	0	0	0.99983	0.74	0.65	0	0	0
226	NP_036527.1	PFTK1	PFTK1	0	0	0.9983	0	0	0.931	0	0	0	0	0	0	0	0.989	0	0	0	0	0.64	0	0	0	0	0	0	0	0	0	0	0.71	0.984	0	0.973	0	0	0
227	NP_006204.1	PHKG1	PHKG1	0	0	0	0	0	0.62	0.936	0	0	0	0	0.65	0	0.78	0.63	0	0	0	0	0	0.63	0	0	0	0.91	0	0	0	0	0	0.999935	0.9917	0.99945	0.78	0	0.89
228	NP_000285.1	PHKG2	PHKG2	0	0	0	0	0	0	0.1	0	0	0	0	0	0	0.71	0	0	0	0	0	0	0	0	0	0	0.86	0	0	0	0	0	0.999986	0.99	0.99941	0	0	0
229	NP_006209.2	PIK3CA	PIK3CA	0	0	0	0	0	0	0	0	0	0	0	0	0	0	0	0	0	0	0	0	0	0	0	0.99985	0	0	0	0	0	0	0	0	0	0	0	0
230	NP_006209.2	PIK3CA	PIK3CA(E545K)	0	0	0	0	0	0	0	0	0	0	0	0	0	0	0	0	0	0	0	0	0	0	0	0.99985	0	0	0	0	0	0	0	0	0	0	0	0
231	NP_002639.1	PIM1	PIM1	0	0	0	0	0	0	0	0	0	0	0	0	0	0.944	0	0	0	0	0	0	0.973	0	0	0	0.944	0	0	0	0	0	0.99968	0	0	0	0	0
232	NP_006866.2	PIM2	PIM2	0	0	0	0	0	0	0	0	0	0	0	0	0	0.923	0	0	0	0	0	0	0.83	0	0	0	0	0	0	0	0	0	0.99981	0	0	0	0	0
233	NP_001001852.1	PIM3	PIM3	0	0	0	0	0	0	0	0	0	0	0	0	0	0.94	0.42	0	0	0	0	0	0.9988	0	0	0	0.944	0	0	0	0	0	0.999949	0.76	0.76	0	0	0
234	AAC50911.1	PIP5K1A	PIP5K1A	0	0	0	0	0	0	0.81	0	0	0	0	0	0	0	0	0	0	0	0.08	0	0.931	0	0	0	0.969	0	0	0	0	0	0.9957	0.987	0.46	0.987	0	0
235	NP_003550.1	PIP5K2B	PIP5K2B	0	0	0	0	0	0	0.974	0	0	0	0	0.74	0	0	0	0	0	0	0.87	0	0.917	0	0	0	0.973	0	0	0	0	0	0.9923	0.974	0.9961	0.986	0	0
236	NP_002721.1	PRKACA	PKAC-alpha	0.31	0	0.63	0	0	0	0	0	0	0	0	0	0	0	0	0	0	0	0	0	0.46	0	0	0	0.928	0	0.83	0	0	0	0.9981	0	0	0	0	0
237	NP_002722.1	PRKACB	PKAC-beta	0	0	0.974	0	0	0	0	0	0	0	0	0	0	0	0	0	0	0	0	0	0.68	0	0	0	0.976	0	0.947	0	0	0	0.9971	0	0	0	0	0
238	NP_872629.1	PKMYT1	PKMYT1	0	0	0	0	0	0	0	0	0	0	0.987	0.71	0	0	0	0	0	0	0	0	0	0	0	0	0	0	0	0	0	0	0	0	0	0	0	0
239	NP_998725.1	PKN1	PKN1	0	0	0	0	0	0	0.982	0	0	0.98	0	0	0	0.65	0	0	0	0	0	0	0.965	0	0	0	0.99907	0	0	0	0	0	0.99987	0.81	0.929	0.85	0	0
240	NP_006247.1	PKN2	PKN2	0	0	0	0	0	0	0.01	0	0	0	0	0	0	0	0	0	0	0	0.81	0	0.85	0	0	0	0.9985	0	0	0	0	0	0.99975	0.62	0.87	0	0	0
241	NP_005021.2	PLK1	PLK1	0	0	0	0	0	0	0	0	0	0	0	0	0	0	0	0	0	0	0.5	0	0	0	0	0	0	0	0	0	0	0	0.981	0	0	0	0	0
242	NP_004064.2	PLK3	PLK3	0.15	0	0	0	0	0	0	0	0	0	0	0	0	0	0	0	0	0	0.29	0	0	0	0	0	0	0	0	0	0	0	0.909	0	0	0	0	0
243	BAB69958.1	PLK4	PLK4	0	0	0	0.53	0	0	0	0	0	0	0	0	0	0	0	0	0.971	0.22	0.988	0	0.53	0	0.959	0	0.9934	0	0	0	0	0.55	0.999923	0.982	0.981	0.99908	0	0.938
244	NP_006245.2	PRKCD	PRKCD	0	0	0	0	0	0	0	0	0	0	0	0.54	0	0.941	0	0	0	0	0.55	0	0.99964	0	0	0	0.968	0	0	0	0	0	0.99985	0	0	0	0	0
245	NP_005391.1	PRKCE	PRKCE	0	0	0	0	0	0	0	0	0	0	0	0	0	0.962	0	0	0	0	0	0	0.9989	0	0	0	0.946	0	0	0	0	0	0.999975	0	0	0	0	0
246	NP_006246.2	PRKCH	PRKCH	0	0	0	0	0	0	0	0	0	0	0	0	0	0.965	0	0	0	0	0	0	0.82	0	0	0	0.971	0	0	0	0	0	0.99952	0	0	0	0	0
247	NP_006248.1	PRKCQ	PRKCQ	0	0	0.78	0	0	0	0.68	0	0	0	0	0	0	0.965	0	0	0	0	0.56	0	0.99975	0	0	0	0.908	0	0	0	0	0	0.99915	0.28	0.57	0	0	0
248	NP_002733.2	PRKD1	PRKD1	0	0	0.88	0	0	0.88	0	0	0	0	0	0	0	0.948	0	0	0	0	0.16	0	0	0	0	0	0	0	0	0	0	0	0.9973	0.76	0.969	0	0	0
249	NP_057541.2	PRKD2	PRKD2	0	0	0.905	0	0	0.61	0	0	0	0	0	0	0	0.89	0	0	0	0	0	0	0.911	0	0	0	0.37	0	0	0	0	0	0.9928	0.63	0.962	0	0	0
250	NP_005804.1	PRKD3	PRKD3	0	0	0.85	0	0	0.925	0	0	0	0	0	0	0	0.983	0	0	0	0	0.58	0	0	0	0	0	0.68	0	0	0	0	0	0.9982	0.73	0.972	0	0	0
251	NP_006249.1	PRKG1	PRKG1	0	0	0	0	0	0	0	0	0	0	0	0	0	0	0	0	0	0	0	0	0	0	0	0	0.975	0	0	0	0	0	0.9968	0	0	0	0	0
252	NP_006250.1	PRKG2	PRKG2	0	0	0	0	0	0	0	0	0	0	0	0	0	0	0	0	0	0	0	0	0.69	0	0	0	0.9926	0	0	0	0	0	0.9984	0	0	0	0	0
253	NP_002750.1	EIF2AK2	PRKR	0	0	0.89	0	0	0	0.72	0.905	0	0	0	0.81	0.87	0.48	0	0	0.81	0	0.37	0	0	0	0	0	0.31	0	0	0	0	0	0.964	0.87	0.933	0	0	0
254	NP_005035.1	PRKX	PRKX	0	0	0	0	0	0	0	0	0	0	0	0	0	0	0	0	0	0	0	0	0	0	0	0	0.904	0	0	0	0	0	0.9987	0	0	0	0	0
255	NP_722560.1	PTK2	PTK2	0	0	0	0	0.29	0	0	0	0	0	0	0	0	0	0	0	0	0	0	0	0	0	0	0	0	0	0	0	0	0	0.9936	0.88	0.956	0	0	0
256	NP_775267.1	PTK2B	PTK2B	0	0	0.948	0	0.901	0	0	0	0	0	0	0	0	0	0	0	0	0	0	0	0	0	0.8	0	0.934	0	0	0	0	0	0.99965	0.94	0.9918	0.74	0	0
257	NP_005966.1	PTK6	PTK6	0	0.9	0	0	0	0	0	0.64	0.62	0	0.99922	0	0	0	0	0	0.77	0	0	0	0	0	0	0	0	0.76	0.32	0.61	0	0	0.77	0	0	0	0	0.984
258	NP_002871.1	RAF1	RAF1	0	0.912	0.907	0	0	0	0	0.961	0	0	0.943	0	0	0	0	0	0.91	0.83	0	0	0	0	0	0.63	0	0	0.81	0.902	0	0.977	0	0	0	0	0	0
259	NP_065681.1	RET	RET	0.99	0.9986	0.9983	0.992	0.95	0	0.9929	0.985	0.58	0	0.927	0	0.87	0	0	0	0.969	0	0.9	0	0	0	0	0	0.965	0	0	0	0	0.9987	0.9985	0.9963	0.9988	0.9972	0	0.9966
260	NP_065681.1	RET	RET(M918T)	0.988	0.998	0.99955	0.988	0.976	0	0.9953	0.9928	0.916	0	0.961	0	0.967	0	0	0	0.973	0	0.58	0	0	0	0	0	0.987	0.24	0	0	0	0.99926	0.9972	0.9976	0.9981	0.9974	0	0.9986
261	NP_113668.2	RIOK1	RIOK1	0	0	0	0	0	0	0.958	0	0	0	0	0	0	0	0	0	0	0	0.89	0	0.919	0	0	0	0.88	0	0	0	0	0	0.987	0.941	0.9965	0.964	0	0
262	NP_003822.2	RIOK3	RIOK3	0	0	0	0	0	0	0.931	0	0	0	0	0	0	0	0	0	0	0	0.88	0	0	0	0	0	0.958	0	0	0	0	0	0.9924	0.03	0.62	0.94	0	0
263	NP_003795.2	RIPK1	RIPK1	0.72	0	0.979	0	0	0	0.968	0	0	0	0	0	0	0	0	0	0.974	0	0.82	0	0	0	0	0	0	0	0	0	0	0	0	0.88	0.963	0.998	0	0
264	NP_003812.1	RIPK2	RIPK2	0	0	0.89	0.82	0	0	0	0.905	0.97	0	0.9969	0	0.932	0	0.947	0	0.942	0	0	0.64	0	0	0	0	0	0	0.985	0.9976	0.66	0.87	0.48	0	0	0	0	0.99954
265	NP_002935.2	ROS1	ROS1	0	0	0.83	0	0	0	0	0	0	0	0	0	0	0	0	0	0.908	0	0	0	0	0	0.69	0	0.957	0	0	0	0	0	0.997	0	0	0.939	0	0
266	NP_002944.2	RPS6KA1	RPS6KA1(Kin.Dom.1 - N-terminal)	0	0	0	0	0	0	0.955	0	0	0	0	0	0	0.77	0	0	0	0	0.6	0	0.96	0	0	0	0.931	0	0	0	0	0	0.9957	0.982	0.986	0	0	0
267	NP_002944.2	RPS6KA1	RPS6KA1(Kin.Dom.2 - C-terminal)	0	0	0	0	0	0	0	0	0.38	0	0	0	0	0.928	0	0	0	0	0	0	0	0	0	0	0	0	0.983	0.968	0.87	0	0.88	0.42	0.5	0	0	0.96
268	NP_066958.2	RPS6KA2	RPS6KA2(Kin.Dom.1 - N-terminal)	0	0	0	0	0	0	0.969	0	0	0	0	0	0	0	0	0	0	0	0.959	0	0.972	0	0	0	0.927	0	0	0	0	0	0.99911	0.974	0.9983	0.8	0	0
269	NP_001006933.1	RPS6KA2	RPS6KA2(Kin.Dom.2 - C-terminal)	0	0	0.89	0	0	0	0	0	0	0.86	0	0.13	0	0.85	0	0	0	0	0	0	0	0	0	0	0	0	0	0	0	0	0.981	0.04	0.16	0	0	0
270	NP_004577.1	RPS6KA3	RPS6KA3(Kin.Dom.1 - N-terminal)	0	0	0	0	0	0	0.44	0	0	0	0	0	0	0	0	0	0	0	0	0	0.64	0	0	0	0.926	0	0	0	0	0	0.9931	0.79	0.942	0.36	0	0
271	NP_001006945.1	RPS6KA4	RPS6KA4(Kin.Dom.1 - N-terminal)	0.28	0	0.81	0	0	0	0.941	0	0	0	0	0	0	0.87	0	0	0	0	0.7	0	0.39	0	0	0	0.974	0	0	0	0	0	0.988	0.98	0.9904	0	0	0
272	NP_003933.1	RPS6KA4	RPS6KA4(Kin.Dom.2 - C-terminal)	0	0	0	0	0	0	0	0	0	0	0	0	0.3	0	0	0	0	0	0	0	0	0	0	0	0	0	0	0	0	0	0.78	0.8	0.8	0	0	0
273	NP_872198.1	RPS6KA5	RPS6KA5(Kin.Dom.1 - N-terminal)	0.88	0	0.927	0	0	0	0.932	0	0	0	0	0	0	0	0	0	0	0	0	0	0.87	0	0	0	0.976	0	0	0	0	0	0.9958	0.985	0.9972	0	0	0
274	NP_004746.2	RPS6KA5	RPS6KA5(Kin.Dom.2 - C-terminal)	0	0	0	0	0	0	0	0	0	0	0	0	0	0	0	0	0	0	0	0	0	0	0	0	0	0	0	0	0	0	0.911	0.85	0.83	0	0	0
275	NP_055311.1	RPS6KA6	RPS6KA6(Kin.Dom.1 - N-terminal)	0	0	0	0	0	0	0.54	0	0	0	0	0	0	0	0	0	0	0	0	0	0.77	0	0	0	0.85	0	0	0	0	0	0.9982	0.69	0.76	0	0	0
276	NP_055311.1	RPS6KA6	RPS6KA6(Kin.Dom.2 - C-terminal)	0	0	0.66	0	0	0	0	0	0	0.88	0	0	0	0.92	0	0	0	0	0	0	0	0	0	0	0	0	0.973	0.975	0	0.25	0.67	0	0	0	0	0.976
277	NP_001012418.1	RP11-145H9.1	SgK085	0	0	0	0	0	0	0.992	0	0	0	0	0	0	0	0	0	0	0	0	0	0	0	0	0	0.936	0	0	0	0	0	0.953	0.9968	0.9985	0.78	0	0
278	NP_055535.2	SLK	SLK	0.955	0.87	0.9977	0	0.985	0	0.97	0.949	0.82	0	0.928	0.964	0.9974	0	0.908	0	0	0	0.9952	0	0.96	0	0	0	0.978	0	0.68	0.63	0	0.9	0.999998	0.954	0.9944	0.9918	0	0.9905
279	NP_112214.1	NUAK2	SNARK	0	0	0	0	0	0.83	0.987	0	0	0.958	0	0.73	0	0.86	0	0	0	0	0.9974	0	0.968	0	0	0	0.9937	0	0	0	0	0	0.999991	0.96	0.985	0.947	0	0
280	NP_775490.2	SNF1LK	SNF1LK	0	0	0.83	0	0	0	0	0	0	0	0.99961	0	0	0	0	0	0.78	0	0.78	0	0	0	0.83	0	0.984	0	0	0	0	0	0.99978	0.73	0.68	0.75	0	0.81
281	NP_056006.1	SNF1LK2	SNF1LK2	0	0	0	0	0	0	0.63	0	0.51	0	0.99936	0.55	0	0	0.79	0	0.27	0	0.84	0	0	0	0	0	0.944	0	0	0	0	0	0.99989	0.925	0.942	0.83	0	0.957
282	NP_005408.1	SRC	SRC	0	0	0.966	0	0	0	0.82	0.89	0.89	0	0.999979	0.972	0.93	0	0.62	0	0.72	0	0	0	0	0	0.92	0	0.88	0	0	0.47	0	0	0.9914	0.51	0.79	0.983	0.45	0.993
283	NP_543013.1	SRMS	SRMS	0	0	0.9928	0.21	0	0	0	0	0.33	0	0.9987	0	0	0.86	0	0	0.75	0	0	0	0	0	0	0	0	0	0	0	0	0.02	0.926	0.9938	0	0	0	0.81
284	NP_003128.3	SRPK1	SRPK1	0	0	0	0	0	0	0.958	0	0	0	0	0	0	0	0	0	0	0	0.72	0	0	0	0	0	0.9958	0	0	0	0	0	0.99945	0.6	0.975	0.9918	0	0
285	AAC05299.1	SRPK2	SRPK2	0	0	0	0	0	0	0.971	0	0	0	0	0	0	0	0	0	0	0	0	0	0	0	0	0	0.967	0	0	0	0	0	0.9933	0.98	0.981	0.932	0	0
286	CAA06700.1	STK16	STK16	0	0	0	0	0	0	0	0	0	0	0	0	0	0	0	0	0.964	0	0.986	0	0	0	0	0	0.972	0	0	0	0	0	0.973	0.927	0.975	0.939	0	0
287	NP_112168.1	STK33	STK33	0.62	0	0.88	0	0	0	0	0	0	0	0	0.55	0	0.83	0	0	0	0	0	0	0.69	0	0	0	0	0	0	0	0	0.76	0.99982	0.987	0.9983	0	0	0.86
288	NP_056505.1	STK36	STK36	0	0	0.87	0.54	0	0.974	0	0	0.55	0	0.979	0.6	0	0	0	0	0.953	0	0	0	0	0	0	0	0	0	0.921	0.87	0	0.62	0.33	0	0	0	0	0
289	NP_003168.2	SYK	SYK	0	0	0.94	0	0	0	0	0	0	0	0.71	0.28	0	0	0	0	0	0	0.87	0	0	0	0	0	0.9912	0	0	0	0	0	0.9986	0	0	0.82	0	0
290	NP_003206.1	TEC	TEC	0	0	0	0	0	0	0	0	0.85	0	0.9987	0	0	0	0	0	0	0	0.9	0	0	0	0.927	0	0	0	0	0	0	0	0.87	0	0	0	0	0
291	NP_006276.2	TESK1	TESK1	0	0	0.76	0	0	0	0	0	0.68	0	0.9967	0	0	0	0	0	0	0	0.69	0	0	0	0	0	0	0	0	0	0	0	0.968	0	0	0.44	0	0.63
292	NP_004603.1	TGFBR1	TGFBR1	0	0	0	0	0	0	0	0	0.04	0	0.977	0	0	0	0	0	0	0	0	0	0	0	0	0	0	0	0	0.29	0.983	0	0.8	0	0	0	0	0
293	NP_003233.4	TGFBR2	TGFBR2	0	0	0.974	0	0	0.76	0	0	0.92	0	0.71	0	0	0.44	0	0	0	0	0	0	0	0	0	0	0	0	0	0.82	0	0	0	0	0	0	0	0
294	NP_005415.1	TIE1	TIE1	0.989	0	0.999971	0.965	0.99917	0	0.6	0.985	0.78	0	0	0.9	0.915	0	0	0	0.93	0	0.974	0	0	0	0.84	0	0.86	0	0	0	0	0.9932	0.9935	0	0	0.973	0	0.85
295	NP_000450.2	TEK	TIE2	0.955	0	0.9981	0.81	0.998	0	0	0.87	0	0	0	0	0	0	0	0	0	0	0.905	0	0	0	0.97	0	0.81	0	0	0	0	0.79	0.986	0	0	0.955	0	0.9
296	NP_036422.3	TLK1	TLK1	0	0	0	0	0	0	0	0	0	0	0	0	0	0	0	0	0	0	0.89	0	0	0	0	0	0	0	0	0	0	0	0.9973	0.937	0.926	0	0	0
297	AAF03095.1	TLK2	TLK2	0	0	0	0	0	0	0.74	0	0	0	0	0	0	0	0	0	0	0	0.925	0	0	0	0	0	0	0	0	0	0	0	0.9984	0.973	0.967	0	0	0
298	NP_055843.1	TNIK	TNIK	0	0	0.9931	0	0.986	0	0.9976	0.85	0	0	0.8	0.983	0	0	0	0	0.969	0	0	0	0	0	0	0	0.84	0	0.84	0.918	0	0	0.99953	0.991	0.9975	0.82	0	0.77
299	AAH35782.1	TNK1	TNK1	0	0	0.994	0	0	0	0	0	0	0.936	0	0	0.937	0	0	0	0	0	0.902	0	0	0	0.76	0	0.9917	0	0	0	0	0.77	0.99975	0.85	0.932	0.9917	0	0
300	NP_001010938.1	TNK2	TNK2	0	0	0	0	0	0	0	0	0	0	0.99944	0.48	0	0	0	0	0	0	0	0	0	0	0	0	0.988	0	0	0	0	0	0.9984	0.51	0.11	0.56	0	0
301	NP_057062.1	TNNI3K	TNNI3K	0	0.978	0.983	0	0	0	0	0.41	0.44	0	0.9989	0.28	0.943	0.9945	0	0	0	0.57	0.86	0	0	0	0	0	0	0	0	0.65	0	0.972	0.9	0	0	0	0	0.72
302	NP_001012331.1	NTRK1	TRKA	0.69	0	0.968	0	0.9	0	0.99	0	0	0	0	0	0	0	0	0.937	0	0	0	0	0	0.955	0	0	0.962	0	0	0	0	0.37	0.9996	0.952	0.99	0.9962	0	0
303	NP_006171.2	NTRK2	TRKB	0.89	0	0.981	0	0.943	0	0.928	0	0	0	0	0	0	0	0	0.9964	0	0	0	0	0	0.926	0	0	0.969	0	0	0	0	0.79	0.99962	0.901	0.941	0.976	0	0
304	AAA75374.1	NTRK3	TRKC	0.979	0	0.9966	0	0.981	0	0.981	0	0	0	0	0	0	0	0	0.988	0	0	0	0	0	0.8	0	0	0.83	0	0	0	0	0.94	0.9983	0.978	0.49	0.98	0	0
305	NP_114417.1	TSSK1	TSSK1	0	0	0	0	0	0	0	0	0	0	0	0	0	0	0	0	0	0	0	0	0	0	0	0	0.52	0	0	0	0	0	0.9976	0	0.37	0	0	0
306	NP_003309.2	TTK	TTK	0	0	0.977	0.15	0.67	0	0	0	0	0	0	0	0	0	0	0	0.985	0	0.981	0	0	0	0	0	0.965	0	0.55	0.75	0	0.65	0.9939	0.982	0.9937	0	0	0
307	NP_003319.1	TXK	TXK	0	0	0	0	0	0	0	0	0.93	0	0.99979	0.45	0	0	0.4	0	0.74	0	0	0	0	0	0	0	0	0	0	0.55	0	0	0.977	0	0	0.73	0	0.63
308	CAA38449.1	TYK2	TYK2(Kin.Dom.2/JH1 - catalytic)	0	0	0.79	0	0	0	0	0	0	0.938	0	0	0	0	0	0	0	0	0.9968	0	0	0	0	0	0.975	0	0	0	0	0	0.9944	0.49	0.84	0	0	0
309	NP_006284.2	TYRO3	TYRO3	0	0	0	0	0	0	0.07	0	0.9	0	0	0.63	0.61	0	0	0	0	0	0	0	0	0	0.69	0	0	0	0	0	0	0	0.972	0.76	0.9951	0	0	0.9907
310	NP_002244.1	KDR	VEGFR2	0.99919	0.9974	0.98	0.95	0.61	0	0.9932	0.87	0	0	0	0	0	0	0	0	0.9986	0	0.63	0	0	0	0	0	0.68	0.9938	0	0	0	0.9941	0.978	0.99977	0.99985	0.8	0	0.918
311	NP_003381.1	WEE1	WEE1	0	0	0	0	0	0	0.88	0	0	0	0.3	0.923	0	0	0	0	0	0	0	0	0	0	0	0	0	0	0	0	0	0	0.84	0.7	0.89	0.68	0	0
312	NP_060871.1	STK32B	YANK2	0.973	0	0	0	0	0	0	0	0	0	0	0.4	0	0	0	0	0	0	0	0	0	0	0	0	0	0	0.51	0.79	0	0	0.9902	0	0	0	0	0
313	NP_775846.2	STK32C	YANK3	0	0	0	0	0	0	0	0	0	0	0	0	0	0	0	0	0	0	0	0	0	0	0	0	0	0	0	0	0	0	0.969	0	0	0	0	0
314	NP_005424.1	YES1	YES	0	0	0.974	0.62	0.51	0	0.942	0.906	0.84	0	0.99997	0.89	0.78	0	0	0	0.5	0	0	0	0	0	0.974	0	0.905	0	0	0	0	0	0.9948	0.974	0.988	0.953	0.84	0.988
315	NP_006365.2	STK25	YSK1	0	0	0.88	0	0	0	0.88	0	0	0	0	0.66	0	0	0	0	0	0	0.964	0	0	0	0	0	0.82	0	0	0	0	0	0.989	0.964	0.971	0.52	0	0
316	NP_598407.1	ZAK	ZAK	0	0.9992	0.99977	0.83	0.914	0	0	0.9937	0.88	0	0.9955	0.88	0	0	0	0	0	0.74	0	0	0	0	0	0	0	0.56	0	0.56	0	0.99937	0	0	0	0.72	0	0.49
317	NP_997402.1	ZAP70	ZAP70	0	0	0	0	0	0	0	0	0	0	0	0	0	0	0	0	0	0	0	0	0	0	0	0	0.74	0	0	0	0	0	0.9956	0	0	0	0	0
