# Supplementary material for: Target Inhibition Networks: Predicting Selective Combinations of Druggable Targets to Block Cancer Survival Pathways
Source: PLoS Comput Biol. 2013 Sep 12;9(9):e1003226. doi: 10.1371/journal.pcbi.1003226 (PMC3772058; doi:10.1371/journal.pcbi.1003226)
Supplement: Dataset S4 — Binding affinity data for the MCF-7, BxPC-3 and MDA-MB-231 studies. (XLSX) [file pcbi.1003226.s004.xlsx]

## Sheet: MCF7 and BxPC-3
Index	Accession Number	Entrez Gene Symbol	Kinase	AZD-6244/ARRY-886 (Selumetinib)	CHIR-258/TKI-258 (Dovitinib)	CHIR-265/RAF-265	Crizotinib	Erlotinib	Lapatinib	Nilotinib	PLX-4720 (Vemurafenib)	Sorafenib	Vandetanib	TAE-684	PHA-665752	PD 0332991	Saracatinib	PD-0325901
1	NP_055726.3	AAK1	AAK1		170		2300	1200						470	320
2	NP_005148.2	ABL1	ABL1-phosphorylated		54	3600	110	76		13	2300	1400	16	170	8200		1
3	NP_005149.3	ABL2	ABL2			1900	460	200		26	2700	2900	69	380	6900
4	NP_001096.1	ACVR1	ACVR1				440						150	29
5	NP_004293.1	ACVR1B	ACVR1B				860							97
6	NP_001607.1	ACVR2A	ACVR2A											2200
7	NP_001097.2	ACVR2B	ACVR2B								3200			4300
8	NP_000011.1	ACVRL1	ACVRL1										470	57
9	NP_064632.2	CABC1	ADCK3					1900					4500	1700
10	NP_079152.3	ADCK4	ADCK4				1100	2500					1700	92
11	NP_005154.2	AKT1	AKT1
12	NP_001617.1	AKT2	AKT2
13	NP_005456.1	AKT3	AKT3
14	NP_004295.2	ALK	ALK		3500		3.3	1200					2100	1.1	2700
15	BAA36547.1	PRKAA1	AMPK-alpha1		520	4500	2400						3000	27	310
16	NP_006243.2	PRKAA2	AMPK-alpha2		820									49	770
17	NP_848605.1	ANKK1	ANKK1		79		780							9400
18	NP_055655.1	NUAK1	ARK5		240									13	620
19	NP_005914.1	MAP3K5	ASK1
20	NP_004663.3	MAP3K6	ASK2											1800
21	NP_003591.2	AURKA	AURKA				260	2200						44
22	AAH00442.2	AURKB	AURKB		280		76	1400			2300	440		150	2000
23	AAC77369.1	AURKC	AURKC		1100		4300	600			2500	210	1500	33	300
24	NP_001690.2	AXL	AXL		3800		7.8	4000				4500	250	12	110
25	NP_060063.2	BMP2K	BIKE		54		740	1200						1900	47
26	NP_001706.2	BLK	BLK		190	7900	110	190		500	1100		66	130	1900
27	NP_004320.2	BMPR1A	BMPR1A											170
28	NP_001194.1	BMPR1B	BMPR1B				230				3100		240	0.85
29	NP_001195.2	BMPR2	BMPR2		3100									3900	6200
30	NP_001712.1	BMX	BMX				3600							1100
31	NP_004324.2	BRAF	B-RAF			1200				1700	330	540
32	NP_005966.1	PTK6	BRK			3600					48		160
33	NP_115806.1	BRSK1	BRSK1											36
34	NP_003948.2	BRSK2	BRSK2											310
35	NP_000052.1	BTK	BTK				7800						1700	190
36	NP_003647.1	CAMK1	CAMK1								1900			23
37	NP_065130.1	CAMK1D	CAMK1D											1100	2100
38	NP_065172.1	CAMK1G	CAMK1G											230	1500
39	NP_741960.1	CAMK2A	CAMK2A											3000
40	NP_001211.3	CAMK2B	CAMK2B											980	3400
41	AAD20442.1	CAMK2D	CAMK2D					6400						1900
42	NP_751913.1	CAMK2G	CAMK2G											570	2900
43	NP_001735.1	CAMK4	CAMK4											780	2000
44	NP_115670.1	CAMKK1	CAMKK1		3100									30
45	NP_006540.3	CAMKK2	CAMKK2				1500							50	64
46	NP_003679.2	CASK	CASK				140							11	73
47	NP_277023.1	CDC2L1	CDC2L1				760							920	1700
48	NP_076916.1	CDC2L2	CDC2L2				420
49	NP_003709.3	CDC2L5	CDC2L5
50	NP_055891.1	CDC2L6	CDK11			5100					700	250
51	NP_001789.2	CDK2	CDK2									8700
52	NP_001249.1	CDK3	CDK3									3800		5200
53	NP_000066.1	CDK4	CDK4-cyclinD1		1200
54	NP_000066.1	CDK4	CDK4-cyclinD3		2900									1400	2500
55	NP_004926.1	CDK5	CDK5									8300		400	380	1
56	NP_001790.1	CDK7	CDK7		2600		330					140	4100	1600
57	NP_001251.1	CDK8	CDK8								1900	310		190	130
58	NP_001252.1	CDK9	CDK9													1
59	NP_004187.2	CDKL1	CDKL1												1800
60	NP_003939.1	CDKL2	CDKL2		180		2100					130
61	NP_001107047.1	CDKL3	CDKL3									490			2400
62	NP_003150.1	CDKL5	CDKL5
63	NP_001265.2	CHEK1	CHEK1		1200
64	NP_001005735.1	CHEK2	CHEK2											44
65	NP_009105.1	CIT	CIT		8200	87		680				6200	1800	72
66	AAA61480.1	CLK1	CLK1		6800					2100	6600	7500
67	NP_003984.2	CLK2	CLK2		1700						2600			12	730	1
68	NP_003983.2	CLK3	CLK3											82	410
69	NP_065717.1	CLK4	CLK4		6500					7100				210	3600	1
70	NP_002871.1	RAF1	C-RAF			390				3900	170	230		110
71	NP_005202.2	CSF1R	CSF1R		60	250	210			45	2700	28	1200	48	700
72	NP_004374.1	CSK	CSK					9600		2400	2200		2500	1800
73	NP_001883.4	CSNK1A1	CSNK1A1
74	NP_660204.1	CSNK1A1L	CSNK1A1L											5200
75	NP_620693.1	CSNK1D	CSNK1D					3500							4200
76	NP_001885.1	CSNK1E	CSNK1E					500					3000		860
77	NP_071331.2	CSNK1G1	CSNK1G1
78	NP_001310.2	CSNK1G2	CSNK1G2								4100
79	NP_004375.2	CSNK1G3	CSNK1G3
80	NP_001886.1	CSNK2A1	CSNK2A1		2600
81	NP_001887.1	CSNK2A2	CSNK2A2		200									9600	5600
82	NP_002369.2	MATK	CTK											2800
83	NP_004929.2	DAPK1	DAPK1											1800
84	NP_055141.2	DAPK2	DAPK2											870
85	NP_001339.1	DAPK3	DAPK3					6000						2200		1
86	NP_004725.1	DCLK1	DCAMKL1				330				8100			4.9	1400
87	NP_001035351.3	DCLK2	DCAMKL2				370							16	990
88	NP_208382.1	DCLK3	DCAMKL3		1300						2500			14	4500
89	NP_001945.3	DDR1	DDR1		2500	13	510	790		1.1	2400	1.5	11	140	70
90	CAA52777.1	DDR2	DDR2		8600	960				33	4100	6.6	320	4100	7600
91	NP_006292.2	MAP3K12	DLK		2100		170							42	670
92	NP_004400.4	DMPK	DMPK				1400	2900						2100
93	NP_059995.2	CDC42BPG	DMPK2					3400					2200	9500
94	NP_004751.1	STK17A	DRAK1		830			6300						2900	4000
95	NP_004217.1	STK17B	DRAK2		1800			9400						7100	3500
96	NP_569121.1	DYRK1A	DYRK1A											2900		1
97	NP_004705.1	DYRK1B	DYRK1B											4500		1
98	NP_003574.1	DYRK2	DYRK2		6000		4000	1300			2700
99	NP_005219.2	EGFR	EGFR	7000				0.67	2.4				9.5	180
100	NP_055228.2	EIF2AK1	EIF2AK1
101	NP_005223.3	EPHA1	EPHA1			7800	140			590		3100	230	39
102	NP_004422.2	EPHA2	EPHA2			2900	100			230		2000	1100	890
103	NP_005224.2	EPHA3	EPHA3				700	2400		110		1900	2000	4000
104	NP_004429.1	EPHA4	EPHA4			8900	360			330		3000	1600	910
105	NP_872272.2	EPHA5	EPHA5				1000	710		1900		3500	240	3700
106	NP_001073917.2	EPHA6	EPHA6			1500	65	440		640		370	50	120
107	NP_004431.1	EPHA7	EPHA7				470	1400				5300	2400	200
108	NP_065387.1	EPHA8	EPHA8			1100	280	940		37		2400	91		3900
109	NP_004432.1	EPHB1	EPHB1				120	1100		1300		3000	290	340
110	NP_059145.2	EPHB2	EPHB2							640		1900	440	1500
111	NP_004434.2	EPHB3	EPHB3							1000				1900
112	NP_004435.3	EPHB4	EPHB4				570	2200		730		1800	520	750
113	NP_004436.2	EPHB6	EPHB6		220	43	6	1700		500	860	240	76	350	2900
114	NP_001005862.1	ERBB2	ERBB2					2900	7				2600	540
115	NP_001973.2	ERBB3	ERBB3					1100	5500				160
116	NP_001036064.1	ERBB4	ERBB4					230	54				480	280
117	NP_002737.2	MAPK3	ERK1											430
118	NP_620407.1	MAPK1	ERK2											300
119	NP_002739.1	MAPK6	ERK3										1500
120	NP_002738.2	MAPK4	ERK4					2500
121	NP_002740.2	MAPK7	ERK5				510							48	1700
122	NP_620590.2	MAPK15	ERK8									46		210
123	NP_001424.3	ERN1	ERN1											180
124	NP_722560.1	PTK2	FAK				310							1.1	1900
125	NP_005237.2	FER	FER			8600	270							1.4
126	NP_001996.1	FES	FES				450				3600			4.8
127	NP_075593.1	FGFR1	FGFR1		150	4700					5300	2800	560	47
128	NP_075259.4	FGFR2	FGFR2		410						3100	2700	1100	250	5200
129	NP_000133.1	FGFR3	FGFR3		230		2700					4200	1600	95	5200
130	NP_075252.2	FGFR4	FGFR4		4300								2300	110
131	NP_005239.1	FGR	FGR		190		670	1100		320	62	7800	270	120	1900
132	NP_004110.2	FLT3	FLT3		0.64	1400	850	1200			1300	13	850	15	250
133	NP_002011.1	FLT4	FLT4		580	2000		2100				95	1100	170	1400
134	NP_002022.1	FRK	FRK		2300	590	2900	2000		86	1900	510	170	27
135	NP_694592.1	FYN	FYN		440	2100	1300			1600	2300	8400	360	1400
136	NP_005246.2	GAK	GAK		490			3.1					86	5.3	1300
137	NP_001013725.2	EIF2AK4	GCN2(Kin.Dom.2,S808G)		250	55		4400			1300			1100	3400
138	NP_002920.1	GRK1	GRK1		2200									410	1100
139	NP_892027.2	GRK4	GRK4		97		4200	7300						3500	420
140	NP_631948.1	GRK7	GRK7		1300									360	61
141	NP_063937.2	GSK3A	GSK3A
142	NP_002084.2	GSK3B	GSK3B		350
143	NP_002101.2	HCK	HCK		3300	1200		1800		390	2700	8500	360	410
144	NP_689909.2	HIPK1	HIPK1		4200						5500	3300		4400	93
145	NP_073577.3	HIPK2	HIPK2		500						5000	1700		4400	120
146	NP_005725.3	HIPK3	HIPK3		5100						9700	440		6900	63
147	NP_653286.2	HIPK4	HIPK4			560	3600	960			5400	3.3		350	1300
148	NP_001036065.1	MAP4K1	HPK1		44		39			890		4800	5500	140	150
149	NP_055401.1	HUNK	HUNK		410								4100	350	1400
150	NP_055735.1	ICK	ICK											4000	400
151	NP_000866.1	IGF1R	IGF1R				780							2.7
152	NP_001269.3	CHUK	IKK-alpha		1800
153	NP_001547.1	IKBKB	IKK-beta				5500
154	NP_054721.1	IKBKE	IKK-epsilon		480		710							1100	700
155	NP_000199.2	INSR	INSR				340							2.4	2300
156	NP_055030.1	INSRR	INSRR				600							6.2	3500
157	NP_001560.2	IRAK1	IRAK1		170		49						1200	45	1600
158	NP_009130.1	IRAK3	IRAK3				31							160	610
159	NP_057207.2	IRAK4	IRAK4		130		3600						75	77	2500
160	NP_005537.3	ITK	ITK		530		2000							34
161	NP_002218.2	JAK1	JAK1(JH1domain-catalytic)				330							410
162	NP_002218.1	JAK1	JAK1(JH2domain-pseudokinase)		380									300	2700
163	NP_004963.1	JAK2	JAK2(JH1domain-catalytic)		130		290	3700						16	430
164	NP_000206.2	JAK3	JAK3(JH1domain-catalytic)		410		200	700				7300		17	470
165	NP_002741.1	MAPK8	JNK1							450				160
166	NP_620707.1	MAPK9	JNK2					2000		5800		7400		280
167	NP_002744.1	MAPK10	JNK3					4300		2000				67
168	NP_000213.1	KIT	KIT		7.5	200		1700		29	180	28	260	110	3200		1
169	NP_004681.1	LATS1	LATS1		1700									1600
170	NP_055387.1	LATS2	LATS2		530									2000
171	NP_005347.3	LCK	LCK		250	640	30	250		47	1800	2700	17	49	320		1
172	NP_002305.1	LIMK1	LIMK1				830				2400	1600		1100
173	NP_005560.1	LIMK2	LIMK2				690				620	9600		1100
174	NP_000446.1	STK11	LKB1		3700										2600
175	NP_005981.3	STK10	LOK		550	60	44	19	4400	6800		150	81	82	290
176	NP_940980.3	LRRK2	LRRK2		1500			2900						1.4
177	NP_996844.1	LTK	LTK				12	890					550	0.95
178	NP_002341.1	LYN	LYN		750	370	940	530		100	1100	3000	110	280
179	NP_004712.1	MAP3K13	LZK		170		230							57	3200
180	NP_005897.1	MAK	MAK												890
181	NP_005912.1	MAP3K1	MAP3K1				1100							4300
182	NP_001001671.2	MAP3K15	MAP3K15				2800							800
183	NP_006600.3	MAP3K2	MAP3K2		71		72	2500						110	5200
184	NP_002392.2	MAP3K3	MAP3K3				110	2300						320	5900
185	NP_005913.2	MAP3K4	MAP3K4		5500								3000	2000	1800
186	NP_004570.2	MAP4K2	MAP4K2		1900	5000	80						1600	190	3600
187	NP_003609.2	MAP4K3	MAP4K3		560	7500	75						1500	65	490
188	NP_663719.1	MAP4K4	MAP4K4		160	1300						4800	1400	970	280
189	NP_006566.2	MAP4K5	MAP4K5		620	830	79				3200	1600	450	190	79
190	NP_116584.2	MAPKAPK2	MAPKAPK2
191	NP_003659.2	MAPKAPK5	MAPKAPK5
192	NP_061120.3	MARK1	MARK1		2300									31
193	NP_059672.2	MARK2	MARK2		1500									44	3600
194	NP_002367.4	MARK3	MARK3		3400									12
195	NP_113605.2	MARK4	MARK4		1700									12
196	NP_055790.1	MAST1	MAST1		40									3300
197	NP_002746.1	MAP2K1	MEK1	99	520						550		1800	550	1100			1
198	NP_109587.1	MAP2K2	MEK2	530	350						1100		1100	630	980			1
199	NP_002747.2	MAP2K3	MEK3				3300							170
200	NP_003001.1	MAP2K4	MEK4								190			150
201	NP_660143.1	MAP2K5	MEK5		32	1900		96	1100	190	0.16	190	49	200	1400
202	NP_002749.2	MAP2K6	MEK6											2000
203	NP_055606.1	MELK	MELK		1600									99
204	AAB60430.1	MERTK	MERTK		1800		3.6	980				3600	1400	19	1300
205	NP_000236.2	MET	MET			6200	2.1	3800					5700	170	0.27
206	NP_001020108.1	MINK1	MINK		9.1		4400	1300			7100		3400	330	250
207	NP_660186.1	MAP2K7	MKK7						4400
208	NP_001129025.1	MKNK1	MKNK1					690				230	360
209	NP_060042.2	MKNK2	MKNK2					1000				130	1700	44
210	NP_872299.2	MYLK3	MLCK		2							9600
211	NP_149132.2	MAP3K9	MLK1		9900									410
212	NP_002437.2	MAP3K10	MLK2											1100
213	NP_002410.1	MAP3K11	MLK3		2200	9500								420
214	NP_003598.2	CDC42BPA	MRCKA										2600
215	NP_006026.3	CDC42BPB	MRCKB							910			2500	4800
216	NP_006273.1	STK4	MST1		200		580							330
217	NP_002438.2	MST1R	MST1R				25							610	2000
218	NP_006272.1	STK3	MST2		480		990							310	1900
219	NP_003567.2	STK24	MST3		430									2900
220	NP_057626.2	MST4	MST4		540		2800							510	3800
221	NP_004949.1	FRAP1	MTOR
222	NP_005583.1	MUSK	MUSK		830		230					130		260
223	NP_444254.3	MYLK	MYLK		3500									220	7900
224	NP_149109.1	MYLK2	MYLK2		92			970				5400			960
225	NP_001012418.1	MYLK4	MYLK4		80						3400
226	NP_059129.3	MYO3A	MYO3A											67
227	NP_001077084.1	MYO3B	MYO3B									7100		81
228	NP_009202.1	STK38	NDR1		660									440
229	NP_055815.1	STK38L	NDR2											580
230	NP_036356.1	NEK1	NEK1
231	NP_665917.1	NEK11	NEK11								190
232	NP_002488.1	NEK2	NEK2		2000						5000			1800	600
233	NP_002489.1	NEK3	NEK3											8800
234	NP_003148.2	NEK4	NEK4		2700
235	NP_954983.1	NEK5	NEK5		2300	3200
236	NP_055212.2	NEK6	NEK6		1500									1300
237	NP_598001.1	NEK7	NEK7		5600		5700							2300
238	NP_149107.3	NEK9	NEK9		9100		790							800
239	NP_699192.1	MGC42105	NIM1		850		4600							2600	8700
240	NP_057315.3	NLK	NLK									640
241	NP_005100.1	OXSR1	OSR1								3900			48
242	NP_620581.1	MAPK14	p38-alpha							460		370
243	NP_002742.3	MAPK11	p38-beta							36		230
244	NP_002745.1	MAPK13	p38-delta									6600
245	AAB40118.1	MAPK12	p38-gamma									7600		9400
246	NP_002567.3	PAK1	PAK1								1400			650	2900
247	NP_002568.2	PAK2	PAK2											5800
248	NP_002569.1	PAK3	PAK3		770									29	1100
249	NP_001014834.1	PAK4	PAK4											2000
250	NP_064553.1	PAK6	PAK6											3500
251	NP_065074.1	PAK7	PAK7											390	2600
252	NP_006192.1	PCTK1	PCTK1		430									560	1100
253	CAA47004.1	PCTK2	PCTK2		3000							1600		810	880
254	NP_002587.2	PCTK3	PCTK3		8400										1500
255	NP_006197.1	PDGFRA	PDGFRA		54	1100		1800		180	190	62	230	840	2000
256	NP_002600.1	PDGFRB	PDGFRB		3.8	240		1400		73	200	37	88	150	1900
257	NP_002604.1	PDPK1	PDPK1
258	NP_631897.1	PFTK2	PFTAIRE2									2900		2100	510
259	NP_036527.1	PFTK1	PFTK1									2900			1300
260	NP_006204.1	PHKG1	PHKG1		640								1100	17	1900
261	NP_000285.1	PHKG2	PHKG2		9000								7900	13	2400
262	NP_002637.2	PIK3C2B	PIK3C2B						670
263	NP_004561.2	PIK3C2G	PIK3C2G						7500
264	NP_006209.2	PIK3CA	PIK3CA
265	NP_006210.1	PIK3CB	PIK3CB
266	NP_005017.2	PIK3CD	PIK3CD
267	NP_002640.2	PIK3CG	PIK3CG
268	NP_002642.1	PI4KB	PIK4CB						940		1200			780
269	NP_002639.1	PIM1	PIM1
270	NP_006866.2	PIM2	PIM2
271	NP_001001852.1	PIM3	PIM3
272	NP_001129110.1	PIP5K1A	PIP5K1A		1900		3200							9700	280
273	NP_036530.1	PIP5K1C	PIP5K1C		4300
274	NP_003550.1	PIP4K2B	PIP5K2B		260										1600
275	NP_079055.2	PIP4K2C	PIP5K2C					1000		8800				2300
276	NP_002721.1	PRKACA	PKAC-alpha											4000
277	NP_002722.1	PRKACB	PKAC-beta											4100
278	NP_872629.1	PKMYT1	PKMYT1
279	NP_998725.1	PKN1	PKN1		180									340
280	NP_006247.1	PKN2	PKN2		9900									680
281	NP_005021.2	PLK1	PLK1											20
282	NP_006613.2	PLK2	PLK2		570									1200	8300
283	NP_004064.2	PLK3	PLK3											210
284	NP_055079.2	PLK4	PLK4				60	1900			3500	4500	620	0.93	410
285	NP_006245.2	PRKCD	PRKCD											3500
286	NP_005391.1	PRKCE	PRKCE											2000
287	NP_006246.2	PRKCH	PRKCH
288	NP_002731.3	PRKCI	PRKCI
289	NP_006248.1	PRKCQ	PRKCQ		3200									1500
290	NP_002733.2	PRKD1	PRKD1				990							80
291	NP_057541.2	PRKD2	PRKD2											160
292	NP_005804.1	PRKD3	PRKD3				510							90
293	NP_006249.1	PRKG1	PRKG1											430
294	NP_006250.1	PRKG2	PRKG2											240
295	NP_002750.1	EIF2AK2	PRKR		2800	950	1100	1300
296	NP_005035.1	PRKX	PRKX											5800
297	NP_003904.3	PRPF4B	PRP4		560									7600	2600
298	NP_775267.1	PTK2B	PYK2				190							1.1	910
299	BAA76843.2	KIAA0999	QSK										3900	1300
300	NP_065681.1	RET	RET		71	150		1300		870		13	34	150	690
301	NP_113668.2	RIOK1	RIOK1		420		6100								470
302	NP_060813.1	RIOK2	RIOK2		260						770
303	NP_003822.2	RIOK3	RIOK3		690		4000							3500	390
304	NP_003795.2	RIPK1	RIPK1		320	5400	1600				5100				1500
305	NP_003812.1	RIPK2	RIPK2			950	900	680	3600		430	1300	4.6	9600
306	NP_065690.2	RIPK4	RIPK4				2100	4900					620	3200
307	Q6XUX3.1	DSTKY	RIPK5				450							57
308	NP_005397.1	ROCK1	ROCK1		760		3700							37
309	NP_004841.2	ROCK2	ROCK2		3100		3300						3600	130	8700	1
310	NP_002935.2	ROS1	ROS1				4.1							0.49	3000
311	NP_001006945.1	RPS6KA4	RPS6KA4(Kin.Dom.1-N-terminal)		590									2500
312	NP_003933.1	RPS6KA4	RPS6KA4(Kin.Dom.2-C-terminal)					7000
313	NP_872198.1	RPS6KA5	RPS6KA5(Kin.Dom.1-N-terminal)		680
314	NP_004746.2	RPS6KA5	RPS6KA5(Kin.Dom.2-C-terminal)												1100
315	NP_002944.2	RPS6KA1	RSK1(Kin.Dom.1-N-terminal)		450									160
316	NP_002944.2	RPS6KA1	RSK1(Kin.Dom.2-C-terminal)										400	650
317	NP_004577.1	RPS6KA3	RSK2(Kin.Dom.1-N-terminal)		5600									17	9900	1
318	NP_066958.2	RPS6KA2	RSK3(Kin.Dom.1-N-terminal)		310									33
319	NP_001006933.1	RPS6KA2	RSK3(Kin.Dom.2-C-terminal)											160
320	NP_055311.1	RPS6KA6	RSK4(Kin.Dom.1-N-terminal)		4600									27	6800
321	NP_055311.1	RPS6KA6	RSK4(Kin.Dom.2-C-terminal)									7500	240	160
322	NP_003152.1	RPS6KB1	S6K1		570		640						1600	2700	4100
323	NP_001019572.1	SBK1	SBK1		1500		1300	1200						21
324	P0C264	SgK110	SgK110				240							54
325	NP_037389.4	SGK3	SGK3		960						7200
326	NP_775490.2	SIK1	SIK								520		1900	15
327	NP_056006.1	SIK2	SIK2		3700		200	2600			1900		430	17	2500
328	NP_055535.2	SLK	SLK		300	510	18	26	3300		5100	1000	95	21	350
329	NP_112214.1	NUAK2	SNARK		130		120							1.2	910
330	NP_060189.3	SNRK	SNRK											300
331	NP_005408.1	SRC	SRC		1800	1100	560	700		1900	4700		70	280			1
332	NP_543013.1	SRMS	SRMS								21	9800	1900	160
333	NP_003128.3	SRPK1	SRPK1		420		1800							4800	41
334	AAC05299.1	SRPK2	SRPK2		290										500
335	NP_055185.2	SRPK3	SRPK3		250		8200	8300						2900	1600
336	CAA06700.1	STK16	STK16		1500						1900			800	4800
337	NP_112168.1	STK33	STK33									2400	1400	3.2	840
338	NP_543026.1	STK35	STK35				610						56	260
339	NP_056505.1	STK36	STK36			8300		4400			2900	3800		1400
340	NP_037365.2	STK39	STK39		530									150
341	NP_003168.2	SYK	SYK			4400	2500							1300
342	NP_663304.1	MAP3K7	TAK1		630	490	1800					690		160	5300
343	NP_065842.1	TAOK1	TAOK1			3900	1200			4700		3100		25	460
344	NP_057235.2	TAOK2	TAOK2			140	900					540		740	1200
345	NP_057365.2	TAOK3	TAOK3			720	490			1700		2700		44	43
346	NP_037386.1	TBK1	TBK1		130		690	3100						470	970
347	NP_003206.1	TEC	TEC											180
348	NP_006276.2	TESK1	TESK1				380				1500		3700
349	NP_004603.1	TGFBR1	TGFBR1				1000							190
350	NP_003233.4	TGFBR2	TGFBR2								890	6900		250
351	NP_005415.1	TIE1	TIE1		4000	150	110	850		1000		68	1500	15	1200
352	NP_000450.2	TEK	TIE2			1300	270			1000		2100	1000	46	6700
353	NP_036422.3	TLK1	TLK1
354	AAF03095.1	TLK2	TLK2		2600
355	NP_055843.1	TNIK	TNIK		24	1500		4500			2500	7900	2300	1200	310
356	NP_003976.2	TNK1	TNK1			6400	320	630				2300		1.8
357	NP_001010938.1	TNK2	TNK2				760				1100			2
358	NP_057062.1	TNNI3K	TNNI3K			5900	110	570		360		280	2800	2000
359	NP_001012331.1	NTRK1	TRKA		100		95					6300		460	320
360	NP_006171.2	NTRK2	TRKB		720		37			490		2100		130	800
361	AAA75374.1	NTRK3	TRKC		190		82			600		600			930
362	NP_060132.3	TRPM6	TRPM6
363	NP_114417.1	TSSK1B	TSSK1B											25	2100
364	NP_003309.2	TTK	TTK					3700				3500		50
365	NP_003319.2	TXK	TXK				850	3800					3700	480
366	NP_003322.2	TYK2	TYK2(JH1domain-catalytic)		150	410	210							77
367	NP_003322.3	TYK2	TYK2(JH2domain-pseudokinase)		2200		2000	2400						1900	6600
368	NP_006284.2	TYRO3	TYRO3		9300		800	3900					93	7200	2000
369	NP_003556.1	ULK1	ULK1		55		1000							0.83	2000
370	NP_055498.2	ULK2	ULK2		54		1600							1.8	1500
371	NP_001092906.1	ULK3	ULK3		170		6700	920					6400	11
372	NP_003381.1	WEE1	WEE1		1200									3000
373	P0C1S8	WEE2	WEE2
374	NP_002010.2	FLT1	VEGFR1		69	800	2300	4400			1900	31	260	550
375	NP_002244.1	KDR	VEGFR2		68	1300		5700			2100	59	820	940
376	NP_006287.2	VRK2	VRK2
377	NP_001106195.1	STK32A	YANK1										5000	13
378	NP_060871.1	STK32B	YANK2											24
379	NP_775846.2	STK32C	YANK3											55
380	NP_005424.1	YES1	YES		580	940	770	2200		1100	1800		120	23	1400		1
381	NP_006365.2	STK25	YSK1		1200	6800								7700
382	NP_079328.3	YSK4	YSK4		12	54	980	25				99	980	2800	78
383	NP_598407.1	ZAK	ZAK			63				11	41	6.3	5100
384	NP_997402.1	ZAP70	ZAP70				4200							1600

## Sheet: MDA-MB-231
Index	Accession Number	Entrez Gene Symbol	Kinase	AB-1010 (Masitinib)	ABT-869 (Linifanib)	AC220 (Quizartinib)	AG-013736 (Axitinib)	AMG-706 (Motesanib)	AZD-1152HQPA (Barasertib , active metabolite of)	AZD-2171 (Cediranib)	AZD-6244/ARRY-886 (Selumetinib)	BI-2536	BIBF-1120 (derivative)	BIBW-2992 (Afatinib)	BIRB-796 (Doramapimod)	SNS-032/BMS-387032	BMS-540215 (Brivanib)	CHIR-258/TKI-258 (Dovitinib)	CHIR-265/RAF-265	CI-1033 (Canertinib)	CP-690550 (Tasocitinib)	Crizotinib	Dasatinib	Erlotinib	EXEL-2880/GSK-1363089 (Foretinib)	Flavopiridol (Alvocidib)	GDC-0941 (Pictilisib)	Gefitinib	Imatinib	INCB18424 (Ruxolitinib)	Lapatinib	LY-317615 (Enzastaurin)	LY-333531 (Ruboxistaurin)	MLN-518 (Tandutinib)	Nilotinib	Pazopanib	PKC-412 (Midostaurin)	PLX-4720 (Vemurafenib)	PTK-787 (Vatalanib)	R406 (Fostamatinib, active metabolite of	SKI-606 (Bosutinib)	Sorafenib	Sunitinib	Vandetanib
1	NP_055726.3	AAK1	AAK1				1200		3000			2800	63					170				2300		1200		5300	9100			120		2700	900			2900	48			410	2300		11
2	NP_005148.2	ABL1	ABL1-phosphorylated	55			36	6700	5500	78		3500	64	570			640	54	3600	30		110	0.046	76	56	1500		480	21						13	650		2300		340	0.057	1400	150	16
3	NP_005149.3	ABL2	ABL2	110			70	4500		730			2000		1300		1800		1900	870		460	0.17	200	27			1600	10						26	3000		2700		720	1.5	2900	1000	69
4	NP_001096.1	ACVR1	ACVR1							3400			600							1700		440	620			1900								2500						4800				150
5	NP_004293.1	ACVR1B	ACVR1B							1500			4900									860	330																	1100
6	NP_001607.1	ACVR2A	ACVR2A																				210			3100
7	NP_001097.2	ACVR2B	ACVR2B				5200																570			2400										2400		3200
8	NP_000011.1	ACVRL1	ACVRL1										4200										460			4500																		470
9	NP_064632.2	CABC1	ADCK3																	1500			190	1900																1100				4500
10	NP_079152.3	ADCK4	ADCK4													2900				3400		1100		2500																64				1700
11	NP_005154.2	AKT1	AKT1																																		950
12	NP_001617.1	AKT2	AKT2																														8700				780						2700
13	NP_005456.1	AKT3	AKT3																													1000	1400				4400								1
14	NP_004295.2	ALK	ALK		1600					2300		160	31					3500		7700		3.3		1200	69	670				1500						2200	270			240	690		170	2100
15	BAA36547.1	PRKAA1	AMPK-alpha1										87			8200		520	4500			2400			730												180			300	3900		19	3000
16	NP_006243.2	PRKAA2	AMPK-alpha2										84					820							1200							5000					460			750			89
17	NP_848605.1	ANKK1	ANKK1				3600		1500						1000			79				780			1500					390										330	2100		310
18	NP_055655.1	NUAK1	ARK5										160					240															1800				41			75	5900		48
19	NP_005914.1	MAP3K5	ASK1
20	NP_004663.3	MAP3K6	ASK2
21	NP_003591.2	AURKA	AURKA		1600		72		400							7400						260	9300	2200	440											7100	120			160			1700
22	AAH00442.2	AURKB	AURKB		390		11		4.6	3200			420					280		4200		76		1400	43									1700			62	2300		110		440	380
23	AAC77369.1	AURKC	AURKC		71		1.3	1900	4.4	2100			190			5000		1100		2800		4300		600	12					8700				1600		750	170	2500		41		210	220	1500
24	NP_001690.2	AXL	AXL		340		420		390	490			12	5300				3800		5700		7.8		4000	0.093	3500		1800				3300		6300			620			82	52	4500	9	250
25	NP_060063.2	BMP2K	BIKE				1000						2.2					54		3800	7100	740		1200						210		2900	430			8800	220			1900	350		5.5
26	NP_001706.2	BLK	BLK	150			3100	2200	1500	120			380	220	680		2000	190	7900	45		110	0.21	190	5.4			1200	520						500	2600	500	1100		25	3.3		65	66
27	NP_004320.2	BMPR1A	BMPR1A																				7000
28	NP_001194.1	BMPR1B	BMPR1B		710		2900													2600		230	53			450				1800						1000		3100		720			2400	240
29	NP_001195.2	BMPR2	BMPR2		7800								56					3100												930											580		570
30	NP_001712.1	BMX	BMX																	2600		3600	1.4		200															180	200
31	NP_004324.2	BRAF	B-RAF					630							2700	1300			1200				500		3500					2200					1700	730		330		240		540
32	NP_005966.1	PTK6	BRK					1000		560									3600	3800			7.8		4.3											2300		48	2400	360			4600	160
33	NP_115806.1	BRSK1	BRSK1																																		1200						3500
34	NP_003948.2	BRSK2	BRSK2													5600																					650						1100
35	NP_000052.1	BTK	BTK						1200	4300			310							1600		7800	1.4		76															190	4.8		2100	1700
36	NP_003647.1	CAMK1	CAMK1										5900								1200				5900		4700			470						2100	2000	1900		230			970
37	NP_065130.1	CAMK1D	CAMK1D									5400	2200								1600				5300					120			4500				670			200	550		510
38	NP_065172.1	CAMK1G	CAMK1G										260														6800			2200						3700	1800			460			440
39	NP_741960.1	CAMK2A	CAMK2A									1300	3600								3500					1700				46			4500				20			1100	4500		80
40	NP_001211.3	CAMK2B	CAMK2B									4200														4700				310							210						1400
41	AAD20442.1	CAMK2D	CAMK2D									2400									2700			6400		1600				90		2800	4600				36			3000			420
42	NP_751913.1	CAMK2G	CAMK2G									1200														2600				100			7800				140			920	3600		690
43	NP_001735.1	CAMK4	CAMK4										3700													3200																	890
44	NP_115670.1	CAMKK1	CAMKK1				1400					22	630					3100							550	79							5000				130						420
45	NP_006540.3	CAMKK2	CAMKK2				1500					23	920									1500			4400	430						6700	2400				73				780		1500
46	NP_003679.2	CASK	CASK													400						140								1500											830
47	NP_277023.1	CDC2L1	CDC2L1		1300				1200							98						760			640											2100
48	NP_076916.1	CDC2L2	CDC2L2		1200				1000							48						420			480											1300
49	NP_003709.3	CDC2L5	CDC2L5		38				1100						1100	23									210	430
50	NP_055891.1	CDC2L6	CDK11		74										200	950			5100						87	57			5500								7200	700	1500			250
51	NP_001789.2	CDK2	CDK2										1400			69										550						5000										8700
52	NP_001249.1	CDK3	CDK3													56										410						1100										3800
53	NP_000066.1	CDK4	CDK4-cyclinD1										160			69		1200								9							280										6200
54	NP_000066.1	CDK4	CDK4-cyclinD3									1900	720			66		2900								3.3							280										2000
55	NP_004926.1	CDK5	CDK5												2000	740										110																8300	6900		1
56	NP_001790.1	CDK7	CDK7		2900				6200			3500	300		3100	31		2600				330			3.7	23		610		3300		2600	1700	3100						7700	1200	140	330	4100
57	NP_001251.1	CDK8	CDK8		95										220	1200									130	120												1900	4500			310			1
58	NP_001252.1	CDK9	CDK9		3000											76									1600	6.4						1300
59	NP_004187.2	CDKL1	CDKL1																																					2100					1
60	NP_003939.1	CDKL2	CDKL2				530		1200				1300			41		180				2100			240							3400		2900						5900		130	1100
61	NP_001107047.1	CDKL3	CDKL3													1400									4400																	490			2
62	NP_003150.1	CDKL5	CDKL5													1.7									2700	7.1							4100
63	NP_001265.2	CHEK1	CHEK1										290					1200															540				1300			2500	3000		300
64	NP_001005735.1	CHEK2	CHEK2						1400			7700													57			800					3700								120		10
65	NP_009105.1	CIT	CIT					300	5700			5200		2900	2100	3900		8200	87	1300				680	3200	110		1300					1400						8800	440	2400	6200	3900	1800
66	AAA61480.1	CLK1	CLK1		8900							940	8.8			410		6800							550	1700	1100		4500			510	910	630	2100		350	6600		1200	600	7500	22
67	NP_003984.2	CLK2	CLK2									460	760			1100		1700								2200	600			460		430	420	6500			860	2600		1600	1700		20
68	NP_003983.2	CLK3	CLK3									630														1600								6600			3600			1900	300
69	NP_065717.1	CLK4	CLK4		1600								18			800		6500							850		1500		2100	1700		1600	1900	1600	7100		410			360	3200		29
70	NP_002871.1	RAF1	C-RAF					880											390				570		4400				1700						3900	900		170		840		230
71	NP_005202.2	CSF1R	CSF1R	7.6	3.4	10	21	5.6	1400	13			48		8100		1900	60	250			210	0.58		1.8	2800			11					4.9	45	7.9	330	2700	45	31	380	28	2.5	1200
72	NP_004374.1	CSK	CSK				1100		3800											6100			1	9600	120										2400		8700	2200		160	32			2500
73	NP_001883.4	CSNK1A1	CSNK1A1									3100				1000										3100				1800											280		99
74	NP_660204.1	CSNK1A1L	CSNK1A1L																							2400															2600		550
75	NP_620693.1	CSNK1D	CSNK1D									1500	1300			1800				4600				3500			1200	3200													240		15
76	NP_001885.1	CSNK1E	CSNK1E							2800		380	230	1300		950				420			1500	500	4600		1200	430													110		13	3000
77	NP_071331.2	CSNK1G1	CSNK1G1									4500														1200																	930
78	NP_001310.2	CSNK1G2	CSNK1G2									5700																										4100					110
79	NP_004375.2	CSNK1G3	CSNK1G3									2400																															240
80	NP_001886.1	CSNK2A1	CSNK2A1										7500					2600												4200										64			900
81	NP_001887.1	CSNK2A2	CSNK2A2				2800						890					200							2800		2400			3300			6700							14			160
82	NP_002369.2	MATK	CTK																																						5800		7700
83	NP_004929.2	DAPK1	DAPK1									540															4000			72			970				4700			55			120
84	NP_055141.2	DAPK2	DAPK2									930	3200																	97							890			62			150
85	NP_001339.1	DAPK3	DAPK3									130	2100											6000	3100		1800	5700		89			8000				1800			13			22
86	NP_004725.1	DCLK1	DCAMKL1									5900	540			1600					6700	330				2100				68								8100					370
87	NP_001035351.3	DCLK2	DCAMKL2													1000						370								760													2700
88	NP_208382.1	DCLK3	DCAMKL3										770			1600		1300			12					1100		2900		260								2500		600	5400		110
89	NP_001945.3	DDR1	DDR1	8.7	58	81	340	260	1800	1.7			12		1.9		160	2500	13	400		510	0.69	790	0.2				0.7					1400	1.1	57	7200	2400	270	9.3	120	1.5	2000	11
90	CAA52777.1	DDR2	DDR2	26	3800	1100	5300		6600	48			42		33			8600	960				3.2		3.6				15					120	33	98		4100		43	140	6.6	2900	320
91	NP_006292.2	MAP3K12	DLK				1700						140					2100				170			22																670		100
92	NP_004400.4	DMPK	DMPK									2900								7000	1200	1400	1300	2900		650		6900		3500		2200	280				3800				91
93	NP_059995.2	CDC42BPG	DMPK2		8300										1200								1200	3400	180																			2200
94	NP_004751.1	STK17A	DRAK1										110	2300		440		830						6300		4100		2000	5300	6200		760					1900			32			1
95	NP_004217.1	STK17B	DRAK2										670					1800		7300				9400		1900		3800		3500							4700			9.2			110
96	NP_569121.1	DYRK1A	DYRK1A											970		340				1500						77				910		160	250				100			260			200
97	NP_004705.1	DYRK1B	DYRK1B										1600	2800		200										84	3800					1000	5400				330						2300
98	NP_003574.1	DYRK2	DYRK2											1800		1700		6000		6700		4000		1300	2000		7600			3700								2700		470			680
99	NP_005219.2	EGFR	EGFR					1300	450	230	7000	2200		0.25	7000					0.19			120	0.67	440	3700		1			2.4			410			1300			300	35			9.5
100	NP_055228.2	EIF2AK1	EIF2AK1						1500	3100															980	870															630
101	NP_005223.3	EPHA1	EPHA1							5200			1200		9800				7800	2500		140	4.1		6.2	2300		4000							590					67	2300	3100		230
102	NP_004422.2	EPHA2	EPHA2										2900		6200				2900			100	0.85		3.6	2500									230					140	18	2000		1100
103	NP_005224.2	EPHA3	EPHA3	2500	3500	6500				3700			8600		880					2100		700	0.093	2400	1	3300		5500		6100					110					360	5.8	1900	2100	2000
104	NP_004429.1	EPHA4	EPHA4												2900				8900	3600		360	1.2		1.9										330					150	18	3000		1600
105	NP_872272.2	EPHA5	EPHA5		1500										1400					1200		1000	0.24	710	6.6	3500		1500							1900					860	27	3500	1200	240
106	NP_001073917.2	EPHA6	EPHA6		330	9100		490		36			940	340	2000		190		1500	270		65	2100	440	1.1			590							640					120	1100	370	960	50
107	NP_004431.1	EPHA7	EPHA7		110	3700				620					860		1700					470		1400	2.5															39		5300	2400	2400
108	NP_065387.1	EPHA8	EPHA8	1800						5300					270				1100	2000		280	0.24	940	1.8			1800	1400						37					1300	9	2400		91
109	NP_004432.1	EPHB1	EPHB1		880								550		4900					1500		120	0.45	1100	12	1500		1300							1300					390	33	3000	480	290
110	NP_059145.2	EPHB2	EPHB2		1400										440					2700			0.39		3.9										640					880	8.4	1900		440
111	NP_004434.2	EPHB3	EPHB3		1400																		6.9		85										1000						210
112	NP_004435.3	EPHB4	EPHB4		1400					1100			1100							1800		570	0.34	2200	12			2500							730					600	9.2	1800	3100	520
113	NP_004436.2	EPHB6	EPHB6		33	1200	360		50	220			140	3100			1400	220	43	640		6	0.039	1700	1.3		1600	3200		3100				1300	500	81	3100	860		310	3000	240	1000	76
114	NP_001005862.1	ERBB2	ERBB2	1200					4300	3000				5						56			1400	2900	580			3500			7										2500			2600
115	NP_001973.2	ERBB3	ERBB3							180				4500						210			18	1100	1500	9200		790			5500										0.77			160
116	NP_001036064.1	ERBB4	ERBB4						470	1400				6.3						6.5			55	230	610	5000		410			54						3100			600	26			480
117	NP_002737.2	MAPK3	ERK1
118	NP_620407.1	MAPK1	ERK2
119	NP_002739.1	MAPK6	ERK3													500				1700								1600																1500
120	NP_002738.2	MAPK4	ERK4													4100				5400				2500				3100																	1
121	NP_002740.2	MAPK7	ERK5									3200	2500			650						510				620															2300		9900		2
122	NP_620590.2	MAPK15	ERK8		2800	270									3000	120									73	330						76	88							640		46
123	NP_001424.3	ERN1	ERN1							510			2000																	2500							2300			1600			600
124	NP_722560.1	PTK2	FAK									150	210		7100							310			180															250	570		440
125	NP_005237.2	FER	FER										73						8600			270			37											2700	1200			130	360		1100
126	NP_001996.1	FES	FES									1900	1200									450			110											1400		3600		200	330		960
127	NP_075593.1	FGFR1	FGFR1				380	6200		53			92		4300		99	150	4700				3700		690							4000				990	1600	5300		44		2800	520	560
128	NP_075259.4	FGFR2	FGFR2				110			35			350				110	410					1400		800											210	2400	3100		73		2700	570	1100
129	NP_000133.1	FGFR3	FGFR3				210			23			93				160	230				2700	3900		910											740	1700			56		4200	290	1600
130	NP_075252.2	FGFR4	FGFR4					6800		860			1800				600	4300																		2800				350			2100	2300
131	NP_005239.1	FGR	FGR	640			1800	6900		1100			300					190		2800		670	0.5	1100	40			2600	2400						320	1600	730	62		33	6.3	7800	270	270
132	NP_004110.2	FLT3	FLT3		0.63	1.3	42	71	8.2				3.8		2300			0.64	1400	2700		850	4800	1200	0.9		2600	3100				330	1900	3		1100	11	1300		0.71	2200	13	0.41	850
133	NP_002011.1	FLT4	FLT4		16	41	170	9.7	2900	4.3			95		7100		56	580	2000					2100	1.5							3800		7200		27	670		330	9.1		95	50	1100
134	NP_002022.1	FRK	FRK	87	400	1800		99		720			2700	1400	1200			2300	590	3400		2900	0.31	2000	3.8	1200		2000	1500						86	750	2400	1900	1800	68	1.4	510	530	170
135	NP_694592.1	FYN	FYN	140				2800		1200			630					440	2100	5300	1100	1300	0.79		88				3100						1600	2700	2100	2300		28	11	8400	520	360
136	NP_005246.2	GAK	GAK		2300		2700			1700		180		79		1800		490		100			2.6	3.1		370	2700	13	1000	99			1100	3700		200	380			250	1.3		20	86
137	NP_001013725.2	EIF2AK4	GCN2(Kin.Dom.2,S808G)					4400					2000					250	55				1600	4400													39	1300		3.3	270		180
138	NP_002920.1	GRK1	GRK1										1000					2200								650				730		1700	800				85			870			290
139	NP_892027.2	GRK4	GRK4				2300						17					97				4200		7300						6100			590				110			450	4900		140
140	NP_631948.1	GRK7	GRK7									850	1200					1300			4300					980				540		1300	310				48			2000	1700		180
141	NP_063937.2	GSK3A	GSK3A										430			28										1300											2500			2500
142	NP_002084.2	GSK3B	GSK3B										83			37		350								730						8.3	2600				1800			120
143	NP_002101.2	HCK	HCK	690				8600	3900	590			5300	2200			2700	3300	1200	4200			0.35	1800	15			4400							390	5700	720	2700		150	3.4	8500	880	360
144	NP_689909.2	HIPK1	HIPK1									4100	1300			1700		4200							420	6800	1100			1200		1000	230					5500		820	520	3300	55
145	NP_073577.3	HIPK2	HIPK2						3700			2900	790			1500		500							220	4200	520			1000		720	140				3100	5000		4800	1900	1700	31
146	NP_005725.3	HIPK3	HIPK3		2300				2500			3600	850			2000		5100							43	4300	600			1200			77				2300	9700		3200	3200	440	41
147	NP_653286.2	HIPK4	HIPK4		46	320			97			2000	1200	360					560	1100		3600		960	0.51	2000	5000	310	960			1200		2400			950	5400		2800	130	3.3	160
148	NP_001036065.1	MAP4K1	HPK1		830		330			920			35					44				39	980		44	3300						1800	2600		890	750	2100			1400	15	4800	16	5500
149	NP_055401.1	HUNK	HUNK				1500					9700						410		6400					5400												240				5000		500	4100
150	NP_055735.1	ICK	ICK										1700			150										0.69	9300					680	240				5900						470
151	NP_000866.1	IGF1R	IGF1R										62									780			430															1300			2600
152	NP_001269.3	CHUK	IKK-alpha										4500					1800							5900												3800			120			520
153	NP_001547.1	IKBKB	IKK-beta																			5500								2300							6300			71					1
154	NP_054721.1	IKBKE	IKK-epsilon										170					480				710			1400	3100				1200							160			13	53		620
155	NP_000199.2	INSR	INSR										24									340			210															1100			500
156	NP_055030.1	INSRR	INSRR		3900								21									600			53															4600			430
157	NP_001560.2	IRAK1	IRAK1				3100					1900	120	240				170		450		49				540		69	1200	290				2700		5900				9.7	600		14	1200
158	NP_009130.1	IRAK3	IRAK3						7900				5300			2900				3000		31			370		1700	1500						730		800	180			11			940
159	NP_057207.2	IRAK4	IRAK4									2100	810					130		1200		3600				1500		540												140	360		66	75
160	NP_005537.3	ITK	ITK				1200						210					530		5600		2000			69															400	1700		13
161	NP_002218.2	JAK1	JAK1(JH1domain-catalytic)					5200					2500								1.6	330								3.4							670			21			6000
162	NP_002218.1	JAK1	JAK1(JH2domain-pseudokinase)										4.8					380									430																49
163	NP_004963.1	JAK2	JAK2(JH1domain-catalytic)				3300						14					130			0.58	290	1000	3700	1500	5500				0.036						1700	94			3.5	1100		410
164	NP_000206.2	JAK3	JAK3(JH1domain-catalytic)				3100						8.2					410		630	0.16	200	640	700		1600				2		1700	1200			6900	12			36	1200	7300	1200
165	NP_002741.1	MAPK8	JNK1				3900						630		9100										5700	1600	1500		5000	4800					450	2000	4400			38					1
166	NP_620707.1	MAPK9	JNK2		240									2100	7.3					1100				2000	670		1800	1700							5800		5000			47		7400	2400
167	NP_002744.1	MAPK10	JNK3		4300		1100					1100	270	2000	110	5900				5500				4300	3900	5500	560	3200	3100						2000	1900	3600			37			4300
168	NP_000213.1	KIT	KIT	8.1	2	4.8	3.2	3.7	17	0.38			5.7		170		36	7.5	200	7800			0.81	1700	2.5				13					2.7	29	2.8	220	180	5.1	6.8	420	28	0.37	260
169	NP_004681.1	LATS1	LATS1		2100								420					1700															2600				1100						630
170	NP_055387.1	LATS2	LATS2		1700								380					530															640				2200			4000			460
171	NP_005347.3	LCK	LCK	31		2500	2700	360	380	67			6.2	570	1200		1100	250	640	320	460	30	0.2	250	6			630	40					7200	47	1200	280	1800		30	0.59	2700	230	17
172	NP_002305.1	LIMK1	LIMK1																			830	570		680											720		2400		620		1600			1
173	NP_005560.1	LIMK2	LIMK2		4700																	690	86		1700											390		620		1400		9600			2
174	NP_000446.1	STK11	LKB1										18					3700															5900				350			3400			38
175	NP_005981.3	STK10	LOK		460	2100	1200	1100	2800	23		4900	87	4300	12		220	550	60	1900		44	1200	19	0.53			470			4400		280	9500	6800	84	590			70	7	150	19	81
176	NP_940980.3	LRRK2	LRRK2				920						46					1500		500	1300			2900		1000				290							570			36	500		110
177	NP_996844.1	LTK	LTK		550				3200	4300		1200	150		1400					5100		12		890	110	2200		5500		440						6800	3000			800	3000		1800	550
178	NP_002341.1	LYN	LYN	61		5700		160	1600	270			940		2700			750	370	810		940	0.57	530	9.1			990	890						100	1100	4200	1100		26	4.2	3000	270	110
179	NP_004712.1	MAP3K13	LZK										140					170				230	5300		16												2800				480		95
180	NP_005897.1	MAK	MAK													2300									1800	28
181	NP_005912.1	MAP3K1	MAP3K1																			1100								4200						2900					4400				1
182	NP_001001671.2	MAP3K15	MAP3K15										1400									2800								1100													1300
183	NP_006600.3	MAP3K2	MAP3K2					6900					9.4					71		3800		72	140	2500	1900	6100		3300		41			710			290	140			94	30		57
184	NP_002392.2	MAP3K3	MAP3K3				2800	2100					34							2300		110	280	2300	4800	9900		2100		150			170				210			150	54		220
185	NP_005913.2	MAP3K4	MAP3K4				5600											5500		8400			310		1900															840	110		4800	3000
186	NP_004570.2	MAP4K2	MAP4K2				1300			540			290					1900	5000	330	4800	80	1300		2000	89				2000			290			2700	2500			670	3.1		33	1600
187	NP_003609.2	MAP4K3	MAP4K3		3200		1200			2000			290					560	7500			75	640		110	4500							8400			1600	120			2400	5.1		180	1500
188	NP_663719.1	MAP4K4	MAP4K4			2500	350	5800		2000			150		90		590	160	1300				3100		190											2200	650				8.2	4800	140	1400
189	NP_006566.2	MAP4K5	MAP4K5		910	440	550		160	100			390				1400	620	830	2600		79	45		4									780		3000	1100	3200			0.5	1600	41	450
190	NP_116584.2	MAPKAPK2	MAPKAPK2
191	NP_003659.2	MAPKAPK5	MAPKAPK5
192	NP_061120.3	MARK1	MARK1										1400					2300																			170			270			1200
193	NP_059672.2	MARK2	MARK2										1400					1500												660							100			280			310
194	NP_002367.4	MARK3	MARK3										770					3400																		4000	21			1900			410
195	NP_113605.2	MARK4	MARK4										2000					1700																			370			89			3600
196	NP_055790.1	MAST1	MAST1										4600			6200		40												520							190				350		200
197	NP_002746.1	MAP2K1	MEK1				2700		1900		99		10					520		1800			1000		12					1900								550		320	19		130	1800
198	NP_109587.1	MAP2K2	MEK2				2600		4200	3100	530		42					350		1600			1400		13					4000								1100		730	9.9		110	1100
199	NP_002747.2	MAP2K3	MEK3										2100									3300				1200				470							5300			100	2600		1700
200	NP_003001.1	MAP2K4	MEK4										3700													2300				1800			930			590	4800	190		200	2600		700
201	NP_660143.1	MAP2K5	MEK5		1200		140		2.8	1500			1.8	1300			3100	32	1900	60			3.3	96	2.5	180		600			1100		1100	3100	190	480		0.16		41	8.2	190	46	49
202	NP_002749.2	MAP2K6	MEK6																														3900			4100	6500			480	1300		5200
203	NP_055606.1	MELK	MELK										4.9			5600		1600							300		5700		1900	2200		5600					280						350
204	AAB60430.1	MERTK	MERTK		870		3200			2600		3100	8.5		3700			1800				3.6		980	0.27	6800								3500		3300	2900			170	110	3600	26	1400
205	NP_000236.2	MET	MET		1300		820			370		2400	200	2200					6200	5600		2.1		3800	1.4							2800				2000	690			280	2200		7200	5700
206	NP_001020108.1	MINK1	MINK				560			540		1600	82		310		310	9.1		2100		4400	430	1300	2600	1300		1800				3500	310				170	7100			3.2		29	3400
207	NP_660186.1	MAP2K7	MKK7																	110											4400										5300
208	NP_001129025.1	MKNK1	MKNK1		4900									1800	6300	3800				260				690	72			290					7100							230		230	3900	360
209	NP_060042.2	MKNK2	MKNK2		270	2600			1200					1600	1600	4300				1800	1600			1000	3.7	3200		1200		200							950			130		130	5700	1700
210	NP_872299.2	MYLK3	MLCK			410	1700						110			1700		2							3000												2300					9600	23
211	NP_149132.2	MAP3K9	MLK1				3000						220					9900							1000	5700							1400			290	15			4.3	2700		3400
212	NP_002437.2	MAP3K10	MLK2										2300												530	5200										2100	790			3.8
213	NP_002410.1	MAP3K11	MLK3										700					2200	9500						340											740	17			11	2700		1300
214	NP_003598.2	CDC42BPA	MRCKA												9400								2000		660	9500																		2600
215	NP_006026.3	CDC42BPB	MRCKB				4800								910								2100		330	3300									910									2500
216	NP_006273.1	STK4	MST1		1400		1400			4300			9					200				580	3800		1100												40				190		19
217	NP_002438.2	MST1R	MST1R		7600					2900												25			3															470	6300
218	NP_006272.1	STK3	MST2		1500		2200						38					480				990				9400						1900	960				220			3000	370		56
219	NP_003567.2	STK24	MST3										110					430																							380		63
220	NP_057626.2	MST4	MST4		8300					4500			49					540				2800	1900							3100		6900									37		340
221	NP_004949.1	FRAP1	MTOR																								200																		1
222	NP_005583.1	MUSK	MUSK		10	1000			1500				590		1900			830				230			13															100		130	490
223	NP_444254.3	MYLK	MYLK									97	290					3500												360			290				2000			6500	490		280
224	NP_149109.1	MYLK2	MYLK2		2800		1300						4000			980		92					3500	970	2300			1900								2000						5400	49
225	NP_001012418.1	MYLK4	MYLK4										440			2400		80									780					230					640	3400		810			15
226	NP_059129.3	MYO3A	MYO3A				1900					6300													2800																6200		3100
227	NP_001077084.1	MYO3B	MYO3B		3200							3500	2700												690																2300	7100	4500		1
228	NP_009202.1	STK38	NDR1															660																						9400			410
229	NP_055815.1	STK38L	NDR2																																								970
230	NP_036356.1	NEK1	NEK1																																					170
231	NP_665917.1	NEK11	NEK11																				470															190		170	650
232	NP_002488.1	NEK2	NEK2									2000						2000					6500													980		5000		260	1600		1400
233	NP_002489.1	NEK3	NEK3									720																		1100										170					1
234	NP_003148.2	NEK4	NEK4															2700																						1800
235	NP_954983.1	NEK5	NEK5															2300	3200																	7300				13
236	NP_055212.2	NEK6	NEK6															1500																						6.3
237	NP_598001.1	NEK7	NEK7									6100						5600				5700								4900										11			4100
238	NP_149107.3	NEK9	NEK9															9100				790			470															16
239	NP_699192.1	MGC42105	NIM1									770						850				4600																		660	1500		850
240	NP_057315.3	NLK	NLK												1000								260		170			4200								4400					2200	640			1
241	NP_005100.1	OXSR1	OSR1										1300																	2700								3900		3100			530
242	NP_620581.1	MAPK14	p38-alpha											1300	0.45								27		320										460							370
243	NP_002742.3	MAPK11	p38-beta		370										7.2								410		760										36							230
244	NP_002745.1	MAPK13	p38-delta												78										54															690		6600
245	AAB40118.1	MAPK12	p38-gamma		2000										2.9										390															390		7600
246	NP_002567.3	PAK1	PAK1																																		2100	1400		260	2300
247	NP_002568.2	PAK2	PAK2										3300																								3300			340	1900
248	NP_002569.1	PAK3	PAK3										210			3500		770							4100							4300					180			690	5700		16
249	NP_001014834.1	PAK4	PAK4				4500						3000																	1600										96			2300
250	NP_064553.1	PAK6	PAK6																											2900										310			2400
251	NP_065074.1	PAK7	PAK7										1300																	1300										69			640
252	NP_006192.1	PCTK1	PCTK1		2800		5300		6300				21			7.1		430							890	440	1100					5300	2600	6000		1200					2400		150
253	CAA47004.1	PCTK2	PCTK2										93			13		3000							170	480														330		1600	1200
254	NP_002587.2	PCTK3	PCTK3										510			44		8400							250	1100	4600																1700
255	NP_006197.1	PDGFRA	PDGFRA	25	4.2	11	0.51	10	38	0.41			16		1200		11	54	1100	5200			0.47	1800	4.5	5900			31					2.4	180	4.9	380	190	96	60	5100	62	0.79	230
256	NP_002600.1	PDGFRB	PDGFRB	8.4	1.9	7.7	0.57	9.1	41	0.32			15		1100		50	3.8	240	7500			0.63	1400	0.96				14			3300		4.5	73	2	110	200	25	3.3	200	37	0.075	88
257	NP_002604.1	PDPK1	PDPK1										2800																				700				190			120			3500
258	NP_631897.1	PFTK2	PFTAIRE2													740									32	330						4900									1600	2900			1
259	NP_036527.1	PFTK1	PFTK1										470			690									31	110						1500									1400	2900	270
260	NP_006204.1	PHKG1	PHKG1										140	1300		3800		640								2200		3700		5700		4200	3700				900				340		5.5	1100
261	NP_000285.1	PHKG2	PHKG2									1600	260	470		460		9000								2900		2700		1000							1400			940	1300		5.9	7900
262	NP_002637.2	PIK3C2B	PIK3C2B																								130				670														1
263	NP_004561.2	PIK3C2G	PIK3C2G																								300				7500						570								2
264	NP_006209.2	PIK3CA	PIK3CA																								1.1
265	NP_006210.1	PIK3CB	PIK3CB																								16
266	NP_005017.2	PIK3CD	PIK3CD									7600															5													4200
267	NP_002640.2	PIK3CG	PIK3CG																								48
268	NP_002642.1	PI4KB	PIK4CB																											3400	940					960		1200		930
269	NP_002639.1	PIM1	PIM1	1300																						560						200	270				560								2
270	NP_006866.2	PIM2	PIM2																							770						870	1700				3100
271	NP_001001852.1	PIM3	PIM3	720																						600		5800				1100	12				560						2400
272	NP_001129110.1	PIP5K1A	PIP5K1A										49					1900				3200											690				310			1900	3300		5400
273	NP_036530.1	PIP5K1C	PIP5K1C															4300								2600						6600	510			1900				130					1
274	NP_003550.1	PIP4K2B	PIP5K2B										17					260															830				270			1200			39
275	NP_079055.2	PIP4K2C	PIP5K2C									110												1000	28	870		7500	380						8800	280				120
276	NP_002721.1	PRKACA	PKAC-alpha		6900																											330	5400				720			600
277	NP_002722.1	PRKACB	PKAC-beta																													590	3200				240			510
278	NP_872629.1	PKMYT1	PKMYT1																				130																		350
279	NP_998725.1	PKN1	PKN1										740					180			170					3500						5100	350				9.3			660	2900		710
280	NP_006247.1	PKN2	PKN2				2700						1400					9900			1200												1500				15			2600	3200		1300
281	NP_005021.2	PLK1	PLK1									0.19																		130										830	1800
282	NP_006613.2	PLK2	PLK2									0.81						570												1500										34	960		4700
283	NP_004064.2	PLK3	PLK3		8500							4																		710										5.1
284	NP_055079.2	PLK4	PLK4		2300		16		4700	2100			53									60		1900	3.5	8400	2600		7800	200			4700	7600		290	66	3500		4.2		4500	190	620
285	NP_006245.2	PRKCD	PRKCD																		2000					590						25	3.6				320			4100	1600
286	NP_005391.1	PRKCE	PRKCE																							380				530		8.9	11				540				2400
287	NP_006246.2	PRKCH	PRKCH																							350						46	1800				290
288	NP_002731.3	PRKCI	PRKCI																														1400												1
289	NP_006248.1	PRKCQ	PRKCQ										5500					3200								350						36	2.5				920				910		4300
290	NP_002733.2	PRKD1	PRKD1									320	990			1200						990				520		3500															310
291	NP_057541.2	PRKD2	PRKD2									510	720			3900										1100							890				6300						380
292	NP_005804.1	PRKD3	PRKD3									350	640			750						510			7500	170											3200			3900	4600		280
293	NP_006249.1	PRKG1	PRKG1										14																			1100					250
294	NP_006250.1	PRKG2	PRKG2																											690		170	3100				74			3600
295	NP_002750.1	EIF2AK2	PRKR				7400					460						2800	950			1100		1300		5200										1900	6900			180			670
296	NP_005035.1	PRKX	PRKX																																		960
297	NP_003904.3	PRPF4B	PRP4										8.4					560															1600				55						390
298	NP_775267.1	PTK2B	PYK2									310	81		990							190			14	3100											660			29	390		82
299	BAA76843.2	KIAA0999	QSK																	700			28							1300							98				64			3900
300	NP_065681.1	RET	RET		100	8	120	14	80	6.1			31		500		390	71	150	4200			730	1300	0.74					720					870	310	350			4.1	4800	13	13	34
301	NP_113668.2	RIOK1	RIOK1				1200					2200	23					420		8400		6100								2500			810				1200			340	2200		35
302	NP_060813.1	RIOK2	RIOK2	1700												1500		260									670			1200						610	97	770		3400			49
303	NP_003822.2	RIOK3	RIOK3				1000					4400	36					690				4000								2000			650				420			210	1600		3800
304	NP_003795.2	RIPK1	RIPK1		2800	890	2500						240					320	5400			1600			850											260		5100					370
305	NP_003812.1	RIPK2	RIPK2			2700	9900	9300	1800	98				2700	5800		2900		950	300		900	31	680	21			530			3600					580		430		970	3700	1300		4.6
306	NP_065690.2	RIPK4	RIPK4				1400						440									2100		4900	900					2100										220			2100	620
307	Q6XUX3.1	DSTKY	RIPK5						3000													450			510	4200											4700				380		1300
308	NP_005397.1	ROCK1	ROCK1															760			470	3700				1200				60							7800			590	870		460
309	NP_004841.2	ROCK2	ROCK2		630													3100			420	3300			1800	1500				52							2300			560	360		140	3600
310	NP_002935.2	ROS1	ROS1				3200						3700									4.1			14								5800			920	430			29
311	NP_001006945.1	RPS6KA4	RPS6KA4(Kin.Dom.1-N-terminal)		7200								620					590								1300						2500	6100				260						96
312	NP_003933.1	RPS6KA4	RPS6KA4(Kin.Dom.2-C-terminal)									12												7000				1200		340										44			2000
313	NP_872198.1	RPS6KA5	RPS6KA5(Kin.Dom.1-N-terminal)		1200								200			9000		680														370	1300				240						28
314	NP_004746.2	RPS6KA5	RPS6KA5(Kin.Dom.2-C-terminal)									270																		140										150			1700
315	NP_002944.2	RPS6KA1	RSK1(Kin.Dom.1-N-terminal)									5400	180					450								2300						1600	400				690			490			140
316	NP_002944.2	RPS6KA1	RSK1(Kin.Dom.2-C-terminal)																	6200	1400					720				120										3800			5000	400
317	NP_004577.1	RPS6KA3	RSK2(Kin.Dom.1-N-terminal)										65					5600								1000	3000					87	3600				740			8000	1200		580
318	NP_066958.2	RPS6KA2	RSK3(Kin.Dom.1-N-terminal)										58					310							5100	4300						220	280				730				3200		17
319	NP_001006933.1	RPS6KA2	RSK3(Kin.Dom.2-C-terminal)									700									600					1500				150													8400
320	NP_055311.1	RPS6KA6	RSK4(Kin.Dom.1-N-terminal)										230					4600								2100	5400			1400		25	2300				1500				2700		2400
321	NP_055311.1	RPS6KA6	RSK4(Kin.Dom.2-C-terminal)									1300		3100							540					800				150												7500		240
322	NP_003152.1	RPS6KB1	S6K1		2800				2800				190					570				640			1200	3700						1800	210				1300				660		48	1600
323	NP_001019572.1	SBK1	SBK1										110	4800				1500				1300	1200	1200				560		1300										93			200
324	P0C264	SgK110	SgK110										2000									240								5800										190			1900
325	NP_037389.4	SGK3	SGK3		1900								1000					960															1400				1400	7200					220
326	NP_775490.2	SIK1	SIK				2100						670										3.9		160											2200	160	520		53	30		3200	1900
327	NP_056006.1	SIK2	SIK2							2100			280					3700		4900		200	6.4	2600	640			2100								7300	560	1900		78	29		580	430
328	NP_055535.2	SLK	SLK		450	4600	1000	1300		22		4100	51	3700	150		170	300	510	1800		18	720	26	3			920			3300	3100	400			240	220	5100		33	4.7	1000	56	95
329	NP_112214.1	NUAK2	SNARK				1300						21			1700		130			240	120				1400		4600		320		4100	320				63			65	220		150
330	NP_060189.3	SNRK	SNRK																																								640
331	NP_005408.1	SRC	SRC	900						81			580	2800			1600	1800	1100	1100		560	0.21	700	20			3800						9600	1900	2800	1200	4700		8.4	1		2100	70
332	NP_543013.1	SRMS	SRMS						7900											6700			13		18	1400										2500		21		610	100	9800		1900
333	NP_003128.3	SRPK1	SRPK1				1800						37					420				1800								2100			1200				42			590			250
334	AAC05299.1	SRPK2	SRPK2										36					290															1100				330						190
335	NP_055185.2	SRPK3	SRPK3				2300						12					250				8200		8300						3300			1600				80			400	3900		59
336	CAA06700.1	STK16	STK16				370					1100	18					1500									1100			490		2500				360	280	1900		1.7			250
337	NP_112168.1	STK33	STK33		3800					540		1100	1100				3200								98	1700						4900	2600				190			970	37	2400	17	1400
338	NP_543026.1	STK35	STK35					5400		5.4			810				26			2900		610	770		230	450														1400	2		1300	56
339	NP_056505.1	STK36	STK36						4600							260			8300	4500			210	4400	180			5700								470		2900		230	570	3800			2
340	NP_037365.2	STK39	STK39										520					530												1900											3700		140
341	NP_003168.2	SYK	SYK									4700							4400			2500	2900		280											4700	88			19	290
342	NP_663304.1	MAP3K7	TAK1			8500		1300	650				4.1		150	1400		630	490	3300		1800	3700		540	2900				730							130			49	100	690	93
343	NP_065842.1	TAOK1	TAOK1		320											1300			3900			1200			3700	140				1300			1800		4700	240				490	1300	3100	890
344	NP_057235.2	TAOK2	TAOK2							5900						1800			140			900	5400		6900	250				310			3900			1800				640	1900	540
345	NP_057365.2	TAOK3	TAOK3		260					5000		1700				620			720			490	2300			99				590			97		1700	45				4600	340	2700	210
346	NP_037386.1	TBK1	TBK1										150					130				690		3100	800	470				1700			970				9.3			23	250		120
347	NP_003206.1	TEC	TEC																	1500			13		310															1600	3200
348	NP_006276.2	TESK1	TESK1				4300													3200		380	33		260													1500		360				3700
349	NP_004603.1	TGFBR1	TGFBR1							1700			4200							9600		1000	230																	2600					1
350	NP_003233.4	TGFBR2	TGFBR2													2400				800			2900			5600										3000		890		330		6900
351	NP_005415.1	TIE1	TIE1		110	3200	97		350	290			2200		8.3		1100	4000	150	2200		110		850	0.79										1000	700	1400			76	2900	68	3900	1500
352	NP_000450.2	TEK	TIE2		450		310		1900	140			1400		20		440		1300			270			3.1										1000	3300	1900			310	3900	2100		1000
353	NP_036422.3	TLK1	TLK1																													510	2100							490	570		740
354	AAF03095.1	TLK2	TLK2															2600														1400								380	2100		330
355	NP_055843.1	TNIK	TNIK		2800	2800	180		8500	810			53		140		160	24	1500	8200			2000	4500	210			6900								310	1600	2500		1300	31	7900	25	2300
356	NP_003976.2	TNK1	TNK1				160						210						6400		120	320		630	21							3400					83			25		2300	680
357	NP_001010938.1	TNK2	TNK2				6000						1600									760	5.6		200					2600							120	1100		70	29		8900
358	NP_057062.1	TNNI3K	TNNI3K					220											5900	5600		110	11	570	130	55			4300						360					310	170	280		2800
359	NP_001012331.1	NTRK1	TRKA		3100	2300	1800						4.5		1000			100				95			4.8					1500				450			380			170	3100	6300	100
360	NP_006171.2	NTRK2	TRKB		1100	620							19		570			720				37			4.1					360				740	490		310			900	1200	2100	590
361	AAA75374.1	NTRK3	TRKC		210	550							32		190			190				82			3.4					330				2000	600		1700			570	3400	600	5100
362	NP_060132.3	TRPM6	TRPM6
363	NP_114417.1	TSSK1B	TSSK1B										6100																								4800			1000	4600		6300
364	NP_003309.2	TTK	TTK				3900		8500			2500	22		3300									3700	430		4300			480						150	350			1100		3500	63
365	NP_003319.2	TXK	TXK				2400						860	3100						700		850	2.1	3800	530			6000								2600				140	72			3700
366	NP_003322.2	TYK2	TYK2(JH1domain-catalytic)				3600						37					150	410		4.8	210	1800		5000	180				0.9						3400	250			190	6500		1600
367	NP_003322.3	TYK2	TYK2(JH2domain-pseudokinase)										500					2200				2000	110	2400		35	1800		8700	1400											4500		360
368	NP_006284.2	TYRO3	TYRO3							830			4900					9300		1000		800		3900	2															1900	61		49	93
369	NP_003556.1	ULK1	ULK1										340			2800		55				1000								300										14	1200		23
370	NP_055498.2	ULK2	ULK2				9900						380					54				1600				470				190										19	450		13
371	NP_001092906.1	ULK3	ULK3				670						60					170		4700	6400	6700	4600	920	450					2400							1300			7.1	460		42	6400
372	NP_003381.1	WEE1	WEE1										2900					1200					7000														4600			890	510		1100
373	P0C1S8	WEE2	WEE2																				200																	9400	94
374	NP_002010.2	FLT1	VEGFR1		7.5	41	5.8	12	110	0.74			63		410	9900	10	69	800	7500		2300	5000	4400	3.8									3100		14	450	1900	9.6	16		31	1.8	260
375	NP_002244.1	KDR	VEGFR2		8.1	87	5.9	26	500	1.1			2.9		3900		5	68	1300				2900	5700	12											14	3200	2100	62	40		59	1.5	820
376	NP_006287.2	VRK2	VRK2																				3200			63				4000											710
377	NP_001106195.1	STK32A	YANK1		640																					5500											2400			2300	1800			5000
378	NP_060871.1	STK32B	YANK2		270												3900
379	NP_775846.2	STK32C	YANK3
380	NP_005424.1	YES1	YES	570			2700	5000	3800	260			80		4900			580	940	1600		770	0.3	2200	48										1100	5000	950	1800		35	4		120	120
381	NP_006365.2	STK25	YSK1															1200	6800				3400		5700					6300							1800			9200	900		290
382	NP_079328.3	YSK4	YSK4		250	2000	270	200	2400	250		480	5.2				500	12	54	700		980	79	25	5.5		4000	240		270		1600	48	5900		940	15		1900	67	16	99	17	980
383	NP_598407.1	ZAK	ZAK	770			2600	8	1700						860				63	1200			45		45				2600						11			41	4400		80	6.3		5100
384	NP_997402.1	ZAP70	ZAP70										3500									4200															2600			21	1600
