# Supplementary material for: Target Inhibition Networks: Predicting Selective Combinations of Druggable Targets to Block Cancer Survival Pathways
Source: PLoS Comput Biol. 2013 Sep 12;9(9):e1003226. doi: 10.1371/journal.pcbi.1003226 (PMC3772058; doi:10.1371/journal.pcbi.1003226)
Supplement: Dataset S5 — TIMMA prediction result for MCF-7 cancer cell. (XLSX) [file pcbi.1003226.s005.xlsx]

## Sheet: LOO prediction error
Drug/Kinases	ZAK	CSF1R	GAK	MEK5	ABL2/EPHA8	ALK/LTK/ROS1/PLK4	MEK1/MEK2	Scaled sensitivity (ActArea)	LOO prediction error
AZD-6244/ARRY-886 (Selumetinib)	0	0	0	0	0	0	1	0.3685	0.1394
CHIR-258/TKI-258 (Dovitinib)	0	0	0	1	0	0	0	0.2356	0.0329
CHIR-265/RAF-265	1	1	0	0	0	0	0	0.0096	0.0096
Crizotinib (PF2341066)	0	0	0	0	0	1	0	0.3181	0.3163
Erlotinib	0	0	1	0	0	0	0	0.2264	0.0237
Lapatinib	0	0	0	0	0	0	0	0.2688	0.219433
Nilotinib	1	1	0	0	1	0	0	0.0786	0.0142
PLX-4720 (Vemurafenib)	1	0	0	1	0	0	0	0.3684	0.1162
Sorafenib	1	1	0	0	0	0	0	0	0.0096
Vandetanib (ZD-6474)	0	0	1	1	1	0	0	0.1366	0.107
TAE-684	0	0	1	0	0	1	0	1	0.6819
PHA-665752	0	0	0	0	0	0	0	0	0.138967
PD 0332991	0	0	0	0	0	0	0	0.1262	0.0293
Saracatinib (AZD0530)	0	0	0	0	0	0	0	0.0219	0.109767
PD-0325901	0	0	0	0	0	0	1	0.2291	0.1394
								Average	0.139178
								STD	0.16747

## Sheet: Predicted efficacy matrix
Kinases			NA	NA	NA	NA	NA	NA	NA	NA	MEK5	MEK5	MEK5	MEK5	MEK5	MEK5	MEK5	MEK5
			NA	NA	NA	NA	ABL2/EPHA8	ABL2/EPHA8	ABL2/EPHA8	ABL2/EPHA8	ABL2/EPHA8	ABL2/EPHA8	ABL2/EPHA8	ABL2/EPHA8	NA	NA	NA	NA
			NA	NA	ALK/LTK/ROS1/PLK4	ALK/LTK/ROS1/PLK4	ALK/LTK/ROS1/PLK4	ALK/LTK/ROS1/PLK4	NA	NA	NA	NA	ALK/LTK/ROS1/PLK4	ALK/LTK/ROS1/PLK4	ALK/LTK/ROS1/PLK4	ALK/LTK/ROS1/PLK4	NA	NA
			NA	MEK1/MEK2	MEK1/MEK2	NA	NA	MEK1/MEK2	MEK1/MEK2	NA	NA	MEK1/MEK2	MEK1/MEK2	NA	NA	MEK1/MEK2	MEK1/MEK2	NA
NA	NA	NA	0.104217	0.29884	0.368544	0.318104	0.318104	0.368544	0.368544	0.173722	0.194379	0.368544	0.368544	0.318104	0.318104	0.368544	0.368544	0.2356
NA	NA	GAK	0.226412	0.368544	1	1	1	1	0.368544	0.192082	0.136557	0.368544	1	1	1	1	0.368544	0.190081
NA	CSF1R	GAK	0.247608	0.368544	1	1	1	1	0.368544	0.247608	0.216843	0.368544	1	1	1	1	0.368544	0.243605
NA	CSF1R	NA	0.136796	0.368544	0.368544	0.318104	0.318104	0.368544	0.368544	0.173722	0.252202	0.368544	0.368544	0.318104	0.318104	0.368544	0.368544	0.252202
ZAK	CSF1R	NA	0.0047874	0.368544	0.368544	0.318104	0.318104	0.368544	0.368544	0.0786389	0.368354	0.368544	0.368544	0.368354	0.368354	0.368544	0.368544	0.368354
ZAK	CSF1R	GAK	0.126198	0.368544	1	1	1	1	0.368544	0.116686	0.368354	0.368544	1	1	1	1	0.368544	0.368354
ZAK	NA	GAK	0.247608	0.368544	1	1	1	1	0.368544	0.247608	0.368354	0.368544	1	1	1	1	0.368544	0.368354
ZAK	NA	NA	0.136796	0.368544	0.368544	0.318104	0.318104	0.368544	0.368544	0.173722	0.368354	0.368544	0.368544	0.368354	0.368354	0.368544	0.368544	0.368354
