# Supplementary material for: Target Inhibition Networks: Predicting Selective Combinations of Druggable Targets to Block Cancer Survival Pathways
Source: PLoS Comput Biol. 2013 Sep 12;9(9):e1003226. doi: 10.1371/journal.pcbi.1003226 (PMC3772058; doi:10.1371/journal.pcbi.1003226)
Supplement: Dataset S6 — Synthetic lethality score for the targets paired with AURKB for BxPC-3 cancer cell. (XLSX) [file pcbi.1003226.s006.xlsx]

## Sheet: Synthetic lethality score
Accession Number	Entrez Gene Symbol	Kinase	AZD-6244/ARRY-886 (Selumetinib)	CHIR-258/TKI-258 (Dovitinib)	Crizotinib	Erlotinib	Lapatinib	PLX-4720 (Vemurafenib)	Sorafenib	Vandetanib	TAE-684	PHA-665752	Saracatinib	PD-0325901	Synthetic lethality score	Rank
NP_002600.1	PDGFRB	PDGFRB	0	1	0	0	0	1	1	1	0	0	0	0	1.50324	1
NP_000213.1	KIT	KIT	0	1	0	0	0	1	1	0	0	0	1	0	1.42847	2
NP_006197.1	PDGFRA	PDGFRA	0	0	0	0	0	1	1	0	0	0	0	0	1.38293	3
NP_598407.1	ZAK	ZAK	0	0	0	0	0	1	1	0	0	0	0	0	1.38293	3
NP_004110.2	FLT3	FLT3	0	1	0	0	0	0	1	0	0	0	0	0	1.32951	4
NP_079328.3	YSK4	YSK4	0	1	0	0	0	0	1	0	0	0	0	0	1.32951	4
NP_001945.3	DDR1	DDR1	0	0	0	0	0	0	1	1	0	0	0	0	1.29949	5
NP_065681.1	RET	RET	0	0	0	0	0	0	1	1	0	0	0	0	1.29949	5
NP_660143.1	MAP2K5	MEK5	0	1	0	0	0	1	0	1	0	0	0	0	1.2489	6
NP_005981.3	STK10	LOK	0	0	1	0	0	0	1	1	0	0	0	0	1.24809	7
NP_005219.2	EGFR	EGFR	0	0	0	1	1	0	0	1	0	0	0	0	1.2414	8
NP_005246.2	GAK	GAK	0	0	0	1	0	0	0	1	1	0	0	0	1.15969	9
NP_000236.2	MET	MET	0	0	1	0	0	0	0	0	0	1	0	0	1.10697	10
NP_001073917.2	EPHA6	EPHA6	0	0	1	0	0	0	0	1	0	0	0	0	1.0374	11
NP_004436.2	EPHB6	EPHB6	0	0	1	0	0	0	0	1	0	0	0	0	1.0374	11
NP_055535.2	SLK	EPHB6	0	0	1	0	0	0	0	1	0	0	0	0	1.0374	11
NP_005148.2	ABL1	ABL1-phosphorylated	0	0	0	0	0	0	0	1	0	0	1	0	1.01553	12
NP_005408.1	SRC	SRC	0	0	0	0	0	0	0	1	0	0	1	0	1.01553	12
NP_005347.3	LCK	LCK	0	0	1	0	0	0	0	1	0	0	1	0	1.01286	13
AAH00442.2	AURKB	AURKB	0	0	1	0	0	0	0	0	0	0	0	0	1	14
NP_004295.2	ALK	ALK	0	0	1	0	0	0	0	0	1	0	0	0	0.957972	15
NP_996844.1	LTK	LTK	0	0	1	0	0	0	0	0	1	0	0	0	0.957972	15
NP_055079.2	PLK4	PLK4	0	0	1	0	0	0	0	0	1	0	0	0	0.957972	15
NP_002935.2	ROS1	ROS1	0	0	1	0	0	0	0	0	1	0	0	0	0.957972	15
NP_002746.1	MAP2K1	MEK1	1	0	0	0	0	0	0	0	0	0	0	1	0.533728	16
NP_109587.1	MAP2K2	MEK2	1	0	0	0	0	0	0	0	0	0	0	1	0.533728	16
